# Supplementary material for: More is not always better: finding the right trade-off between affinity and selectivity of a G-quadruplex ligand
Source: PubMed Central journal article supplement — Nucleic Acids Res. 2018 Jul 9;46(19):e115. doi: 10.1093/nar/gky607 (PMC6212845; doi:10.1093/nar/gky607), 2018-07-09
Supplement: gky607_supplemental_figures.pdf [file gky607_supplemental_figures.pdf]

# More is not always better: finding the right trade-off between affinity and selectivity of a G4 ligand

Michela Zuffo<sup>1</sup>, Aurore Guédin<sup>2</sup>, Emma-Dune Leriche<sup>2</sup>, Filippo Doria<sup>1</sup>, Valentina Pirola<sup>1</sup>, Valérie Gabelica<sup>2</sup>, Jean-Louis Mergny<sup>2,3,\*</sup> and Mauro Freccero<sup>1,\*</sup>

<sup>1</sup> Dipartimento di Chimica, Università di Pavia, Pavia, 27100, Italy

<sup>2</sup> ARNA Laboratory, Université de Bordeaux, Inserm U1212, CNRS UMR5320, Institut Européen de Chimie Biologie (IECB), Pessac, 33607, France

<sup>3</sup> Institute of Biophysics, AS CR, Brno, 61265, Czech Republic

\* To whom correspondence should be addressed. Tel: +390382987668; Fax: +390382987323; Email: [mauro.freccero@unipv.it](mailto:mauro.freccero@unipv.it)

Correspondence may also be addressed to Tel: +33540003022; Fax: +33540003004; Email: [jean-louis.mergny@inserm.fr](mailto:jean-louis.mergny@inserm.fr)

Present Address: Michela Zuffo, Institut Curie, CNRS UMR9187, INSERM U1196, PSL Research University, Orsay, 91400, France

## Contents

|                                                                                      |           |
|--------------------------------------------------------------------------------------|-----------|
| <b>Table S1</b> Nucleic acid sequences used in the present study                     | p. S2     |
| <b>Table S2</b> Labelled nucleic acid sequences used for FRET melting assays         | p. S2     |
| <b>Table S3</b> Competitor nucleic acid sequences used for FRET melting assays       | p. S2     |
| <b>Fig. S1</b> Aggregation experiments in methanol                                   | p. S3     |
| <b>Fig. S2</b> Aggregation experiments in DMSO                                       | p. S3     |
| <b>Fig. S3</b> Aggregation constants calculation                                     | p. S4     |
| <b>Fig. S4</b> Experiments at variable solvent composition                           | p. S5     |
| <b>Fig. S5</b> Absorption spectra in SDS                                             | p. S5     |
| <b>Fig. S6</b> Ionic strength-dependent experiments for $C_{ex}$ -NDI 1              | p. S6     |
| <b>Fig. S7</b> Spectrophotometric pH-dependent titration for $C_{ex}$ -NDI 1         | p. S6     |
| <b>Fig. S8</b> Temperature-dependent experiments for $C_{ex}$ -NDI 1                 | p. S7     |
| <b>Fig. S9</b> Ionic strength-dependent experiments for $C_{ex}$ -NDI 2              | p. S7     |
| <b>Fig. S10</b> Temperature-dependent experiments for $C_{ex}$ -NDI 2                | p. S8     |
| <b>Fig. S11</b> pH-dependent experiments for $C_{ex}$ -NDI 2                         | p. S8     |
| <b>Fig. S12</b> FRET experiments with various NA competitors                         | p. S9     |
| <b>Fig. S13</b> FID assay on Pu24 with $C_{ex}$ -NDI 2                               | p. S9     |
| <b>Fig. S14</b> FID assay monitored by native MS                                     | p. S10    |
| <b>Fig. S15</b> Fluorescence titrations on $C_{ex}$ -NDI 2 with parallel G4s         | p. S11    |
| <b>Tab. S4</b> Statistical analysis of fluorescence light-up factors                 | p. S11    |
| <b>Fig. S16</b> Fitting of fluorescence titrations data                              | p. S12    |
| <b>Fig. S17</b> LOD calculation                                                      | p. S12    |
| <b>Fig. S18</b> CD titrations of selected NAs with $C_{ex}$ -NDI 1 and 2             | p. S13    |
| <b>Fig. S19</b> Native gels staining with SYBR Gold                                  | p. S13    |
| <b>Fig. S20</b> Fluorescence titrations of 26TTA and Pu24 with $C_{ex}$ -NDI 1 and 2 | p. S14    |
| <b>Fig. S21</b> CD titrations of 26TTA and Pu24 with $C_{ex}$ -NDI 1 and 2           | p. S14    |
| <b>Fig. S22</b> MS experiments on 26TTA and Pu24 mixtures with $C_{ex}$ -NDI 1       | p. S15    |
| <b>HPLC purity data</b>                                                              | p. S16-18 |
| <b>NMR spectra</b>                                                                   | p. S19-24 |

**Table S1.** Nucleic acid sequences used in the present studies. a) auto-complementary duplex. DNA and RNA sequences start with 5'-d and 5'-r, respectively.

| Nucleic acid | Sequence                                      | Length | Topology                    |
|--------------|-----------------------------------------------|--------|-----------------------------|
| 25Ceb        | 5'-d(AGGGTGGGTGTAAGTGTGGGTGGGT)-3'            | 25     | Parallel (1)                |
| c-myc        | 5'-d(TGAGGGTGGGTAGGGTGGGTAA)-3'               | 22     | Parallel (2)                |
| 32KRAS       | 5'-d(AGGGCGGTGTGGGAAGAGGGGAAGAGGGGGAGG)-3'    | 32     | Parallel (2)                |
| 22AG         | 5'-d(AGGGTTAGGGTTAGGGTTAGGG)-3'               | 22     | Hybrid (2)                  |
| 21CTA        | 5'-d(GGGCTAGGGCTAGGGCTAGGG)-3'                | 21     | Anti-parallel (3)           |
| Bom17        | 5'-d(GGTTAGGTTAGGTTAGG)-3'                    | 17     | Anti-parallel (4)           |
| TBA 15       | 5'-d(GGTTGGTGTGGTTGG)-3'                      | 15     | Anti-parallel (5)           |
| ds26         | 5'-d(CAATCGGATCGAATTCGATCCGATTG)-3'           | 26     | Duplex DNA (2) <sup>a</sup> |
| Pu24         | 5'-d(TGAGGGTGGGGAGGGTGGGGAAGG)-3'             | 24     | Parallel (6)                |
| hRAS1        | 5'-d(TCGGGTTGCGGGCGCAGGGCACGGGCG)-3'          | 27     | Anti-parallel (7)           |
| ss SCR       | 5'-d(GGATGTGAGTGTGAGTGTGAGG)-3'               | 22     | Single strand (2)           |
| VAV1         | 5'-d(GGGCAGGGAGGGAAGTGGG)-3'                  | 19     | Parallel (7)                |
| VEGF         | 5'-d(GGGAGGGTTGGGGTGGG)-3'                    | 17     | Parallel (5)                |
| c-kit2       | 5'-d(CCCGGGCGGGCGGAGGGAGGGGAGG)-3'            | 26     | Parallel (2)                |
| c-kit1       | 5'-d(AGGGAGGGCGCTGGGAGGAGGG)-3'               | 22     | Parallel (2)                |
| Bcl2         | 5'-d(GGGCGGGCGCGGGAGGAAGGGGGCGGG)-3'          | 27     | Parallel (5)                |
| TERRA        | 5'-r(AGGGUUAGGGUUAGGGUUAGGG)-3'               | 22     | Parallel (3)                |
| NRAS         | 5'-r(UGUGGGAGGGGCGGGUCUGGG)-3'                | 21     | Parallel (8)                |
| ss37         | 5'-d(GTTTAGTTAGTTTAGTTAGTTAGTTAGTTAGTTAGT)-3' | 37     | Single strand               |
| mir122       | 5'-r(UGGAGUGUGACAUGGUGUUUG)-3'                | 21     | Single strand               |
| SL2          | 5'-r(UCACGGCUAGCUGUGAAAGGUCCGGUGA)-3'         | 28     | Hairpin                     |
| 26TTA        | 5'-d(TTAGGGTTAGGGTTAGGGTTAGGGTT)-3'           | 26     | Hybrid (9)                  |

**Table S2.** Labelled DNA sequences used in the present study. All sequences are provided in the 5' => 3' direction, F = FAM, T = TAMRA.

| Labelled DNA | Sequence                                   | Topology (4)   |
|--------------|--------------------------------------------|----------------|
| F25CebT      | F-AGGGTGGGTGTAAGTGTGGGTGGG-T               | Parallel       |
| FmycT        | FAM-TTGAGGGTGGGTAGGGTGGGTAA-T              | Parallel       |
| F32KRAST     | F-AGGGCGGTGTGGGAAGAGGGGAAGAGGGGGAGG-T      | Parallel       |
| FBom17T      | F-GGTTAGGTTAGGTTGG-T                       | Anti-parallel  |
| F21CTAT      | F-GGGCTAGGGCTAGGGCTAGGG-T                  | Anti-parallel  |
| FTBAT        | F-GGTTGGTGTGGTTGG-T                        | Anti-parallel  |
| F21T         | F-GGGTTAGGGTTAGGGTTAGGG-T                  | Hybrid         |
| FdxT         | F-TATAGCTAT-hexaethyleneglycol-ATAGCTATA-T | Hairpin duplex |

**Table S3.** DNA Competitor sequences used in the present study

| Nucleic acid | Sequence                                          | Topology                  |
|--------------|---------------------------------------------------|---------------------------|
| ds26         | 5'-d(CAATCGGATCGAATTCGATCCGATTG)-3'               | Auto-complementary duplex |
| dx           | 5'-d(TATAGCTATA-hexaethyleneglycol-TATAGCTATA)-3' | Hairpin duplex            |
| dx12 a       | 5'-d(GCGTGAGTTCGG)-3'                             | Duplex                    |
| dx12 b       | 5'-d(CCGAACTCACGC)-3'                             |                           |
| Bom37mut     | 5'-d(GTTTAGTTAGTTTAGTTAGTTAGTTAGTTAGT)-3'         | Single strand             |

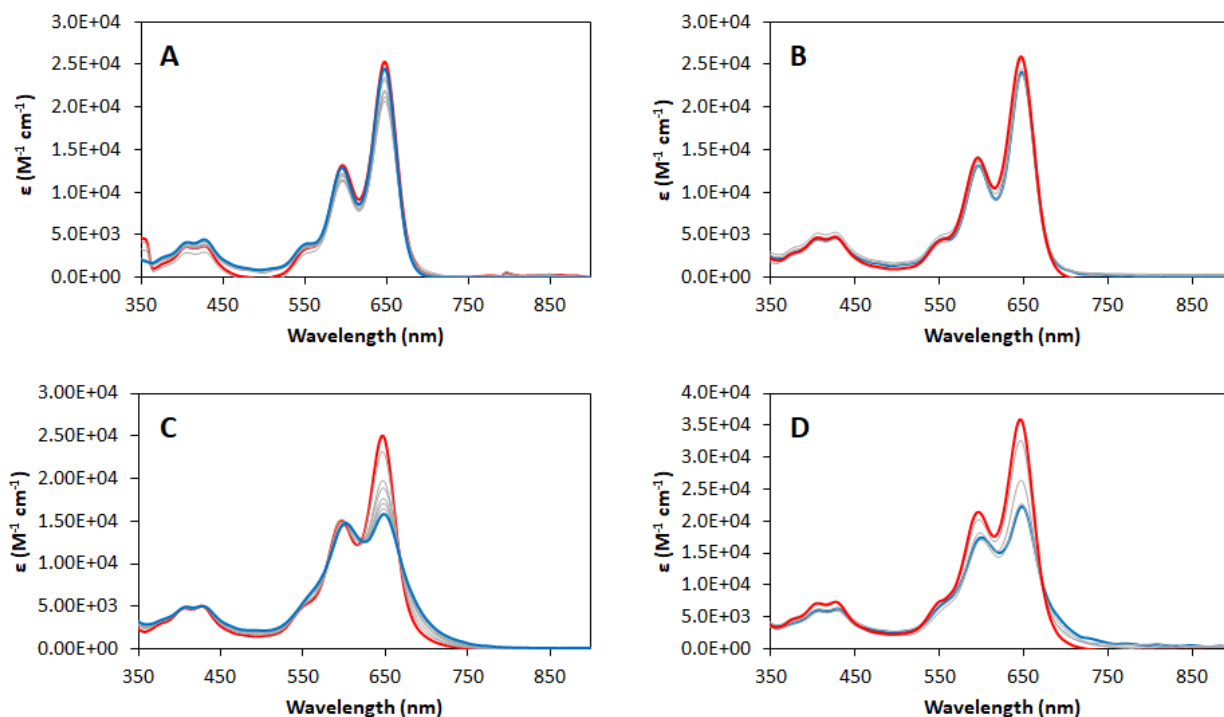

**Figure S1.** Concentration and temperature dependent experiments conducted in methanol. A) Absorption spectra recorded on a solution of  $c_{\text{ex-NDI 1}}$  varying its concentration between  $5 \times 10^{-6}$  and  $7 \times 10^{-5}$  M; B) absorption spectra recorded on a  $1 \times 10^{-5}$  M solution of  $c_{\text{ex-NDI 1}}$  varying the temperature between 5 and  $60^\circ\text{C}$ ; C) the same as A, using  $c_{\text{ex-NDI 2}}$ ; D) the same as B, using  $c_{\text{ex-NDI 2}}$ . In all graphs the blue curve represents the initial spectrum (low concentration or temperature) and the red curve represents the final one (high concentration or temperature).

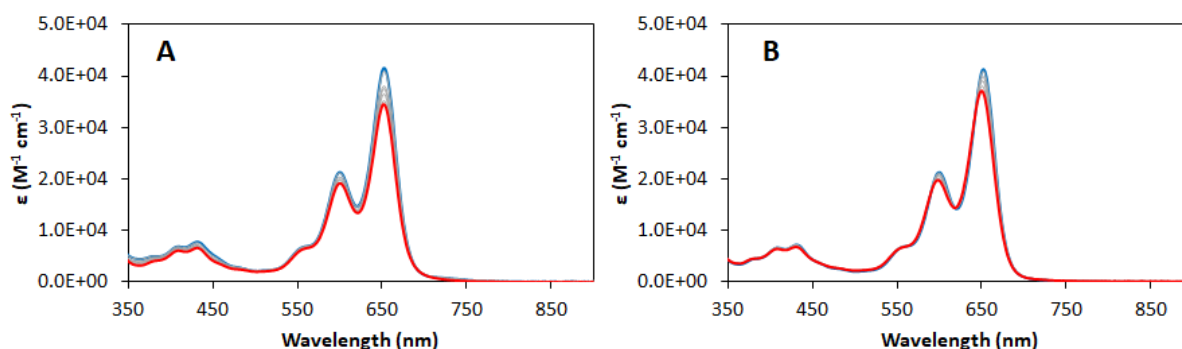

**Figure S2.** Concentration and temperature dependent experiments conducted in DMSO on  $c_{\text{ex-NDI 2}}$ . A) Absorption spectra recorded varying  $c_{\text{ex-NDI 2}}$  concentration between  $5 \times 10^{-6}$  and  $6 \times 10^{-5}$  M; B) absorption spectra recorded on a  $1 \times 10^{-5}$  M solution of  $c_{\text{ex-NDI 2}}$  varying the temperature between 20 and  $70^\circ\text{C}$ . In both graphs the blue curve represents the initial spectrum (low concentration or temperature) and the red curve represents the final one (high concentration or temperature).

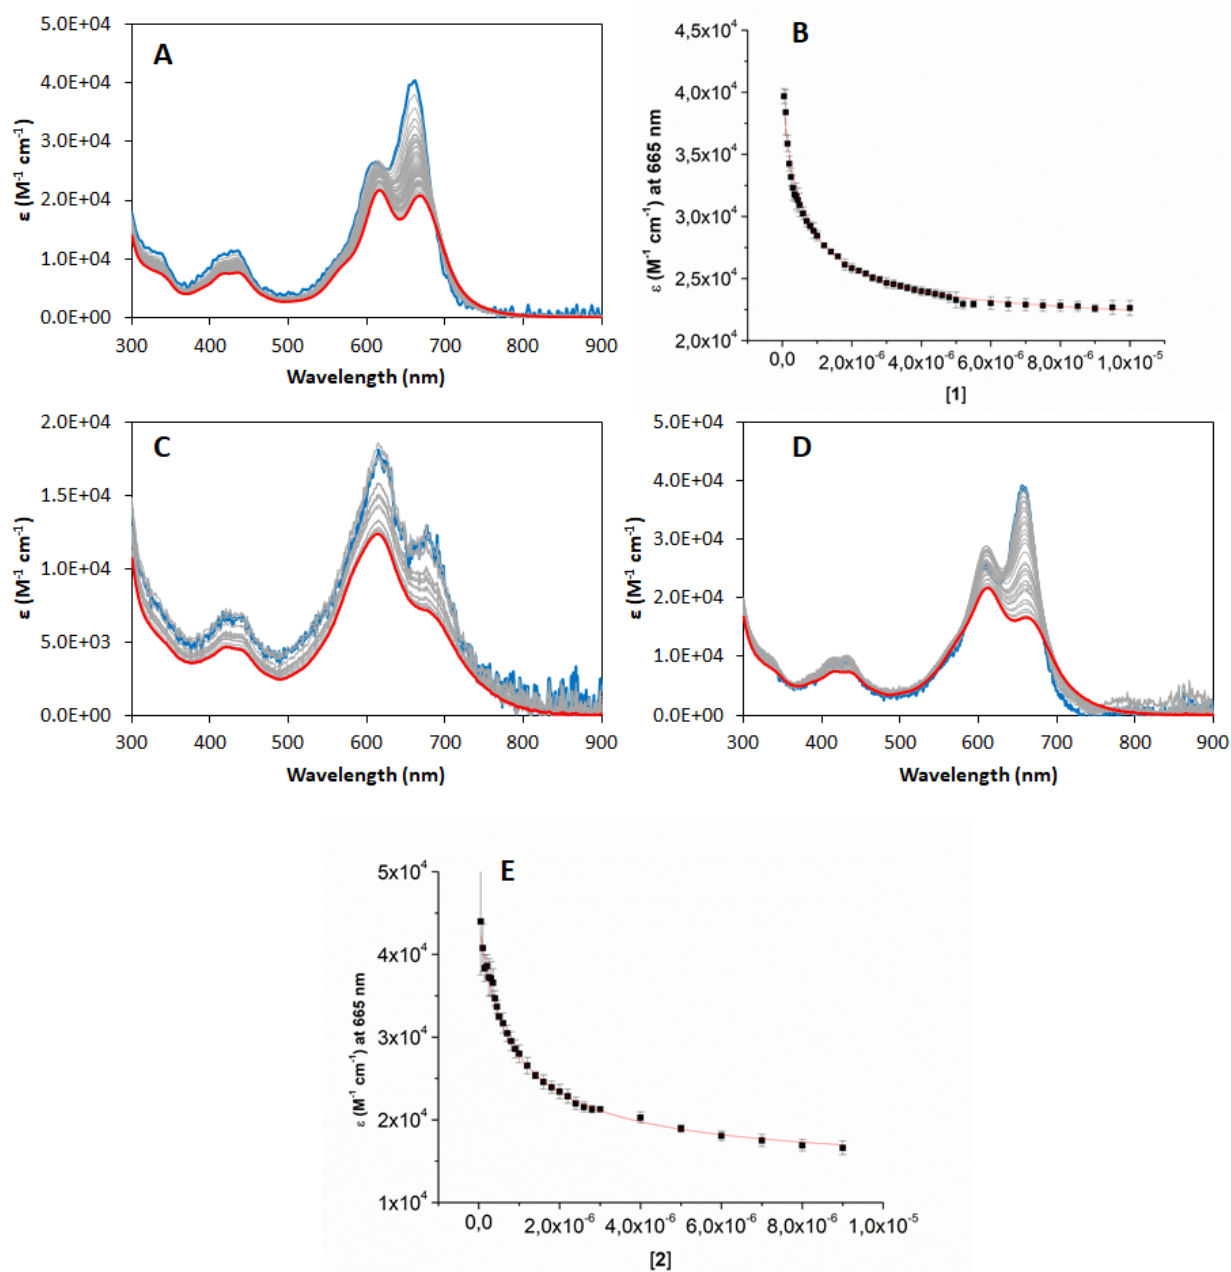

**Figure S3.** Aggregation constants calculation. A) Absorption spectra of a solution of  $c_{ex}$ -NDI **1** in water ( $1 \times 10^{-2}$  M TRIS-HCl buffer, pH 7.2), recorded while varying its concentration between  $5 \times 10^{-8}$  and  $1 \times 10^{-5}$  M; B) isodesmic fitting of the molar absorptivity coefficient data at 665 nm obtained from A; C) the same as A, with  $c_{ex}$ -NDI **2**; D) absorption spectra of a solution of  $c_{ex}$ -NDI **1** in water and methanol (1:1 mixture,  $1 \times 10^{-2}$  M TRIS-HCl buffer, pH 7.2), recorded while varying its concentration between  $5 \times 10^{-8}$  and  $9 \times 10^{-6}$  M; E) isodesmic fitting of the molar absorptivity coefficient data at 665 nm obtained from D.

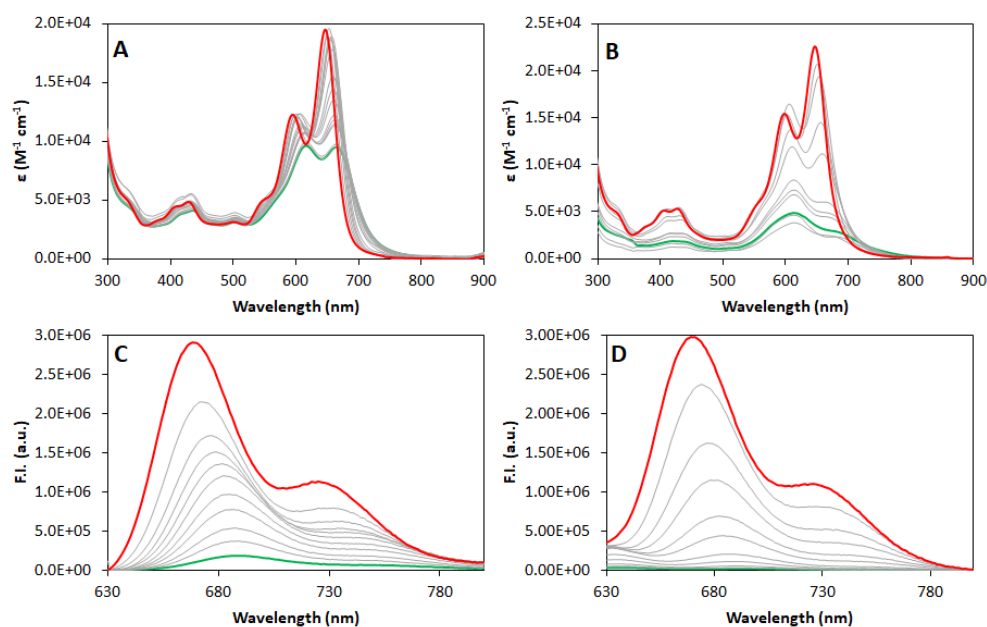

**Figure S4.** A) Absorption spectra of  $2 \times 10^{-5}$  M solutions of  $c_{ex}$ -NDI 1 in MeOH-water mixtures at varying compositions (0-100%); B) the same as A, with  $c_{ex}$ -NDI 2; C) Emission spectra of  $5 \times 10^{-6}$  of  $c_{ex}$ -NDI 1 in MeOH-water mixtures at varying compositions (0-100%) ( $\lambda_{exc} = 620$  nm); D) the same as C, with  $c_{ex}$ -NDI 2. Green: pure water, Red: pure methanol. pH was fixed in water at 7.2 with  $1 \times 10^{-2}$  M lithium cacodylate buffer.

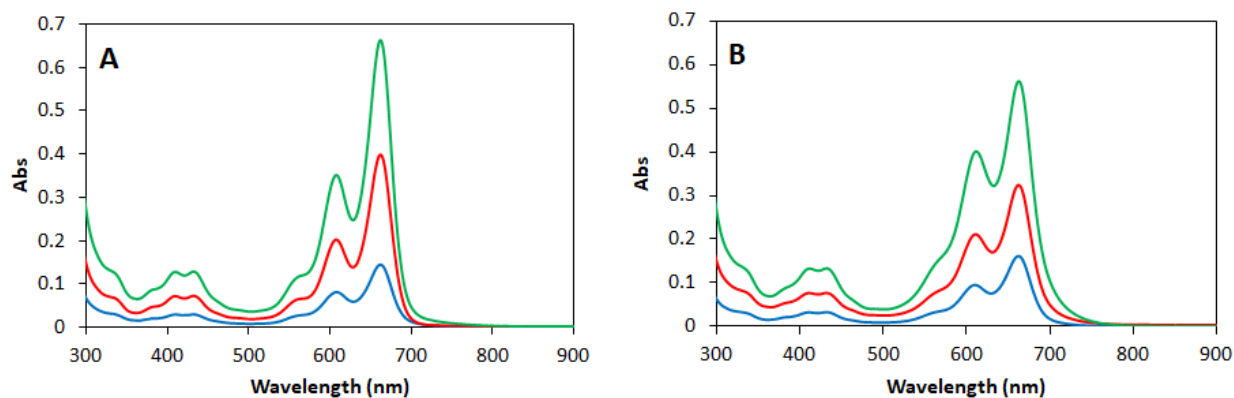

**Figure S5.** Absorption spectra of  $2 \times 10^{-2}$  M SDS water solutions of A)  $c_{ex}$ -NDI 1 B)  $c_{ex}$ -NDI 2. pH was fixed at 7.2 with  $1 \times 10^{-2}$  M lithium cacodylate buffer. Compounds concentration: blue =  $5 \times 10^{-6}$  M, red =  $1 \times 10^{-5}$  M, blue =  $2 \times 10^{-5}$  M.

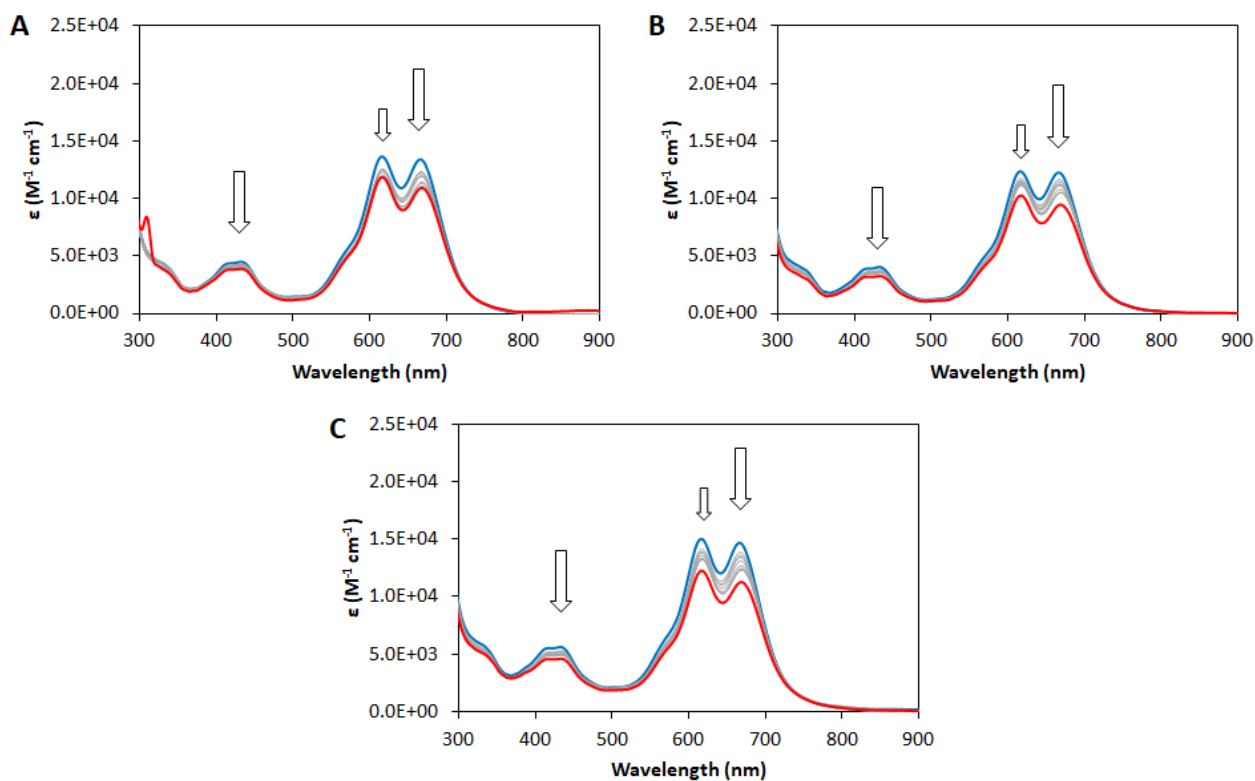

**Figure S6.** Absorption spectra of  $1 \times 10^{-5}$  M solutions of  $c_{ex}$ -NDI **1** in water (pH 7.2,  $1 \times 10^{-2}$  M TRIS-HCl buffer) with  $0$ - $2 \times 10^{-1}$  M A) KCl, B) NaCl, C) LiCl. Blue: no salt; Red  $2 \times 10^{-1}$  M salt.

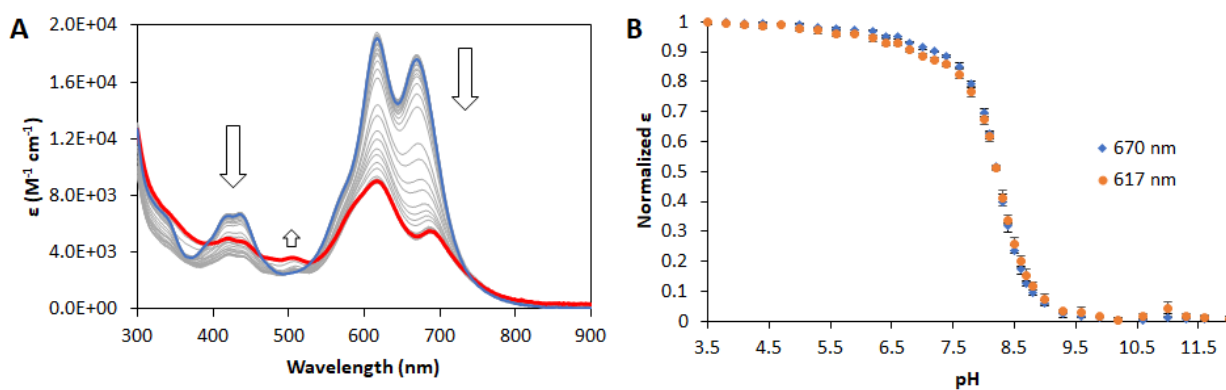

**Figure S7.** A) Absorption spectra of a  $1 \times 10^{-5}$  M solution of  $c_{ex}$ -NDI **1** in water recorded while gradually varying the pH from 3.5 to 12 with the addition of NaOH; B) normalized molar absorptivity coefficient data in the two maxima (617 and 670 nm), plotted as a function of pH.

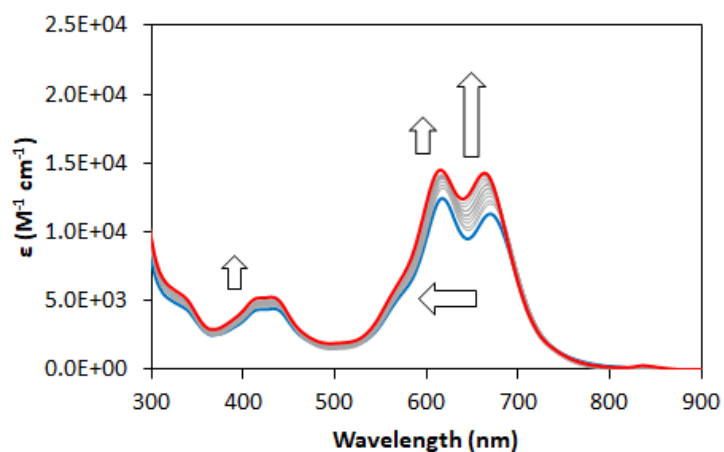

**Figure S8.** Absorption spectra of a  $2 \times 10^{-5}$  M solution of compound **1** in water (pH 7.2,  $1 \times 10^{-2}$  M lithium cacodylate buffer,  $1 \times 10^{-1}$  M KCl) at increasing temperature (25-95°C). Blue = 25°C, Red = 95°C.

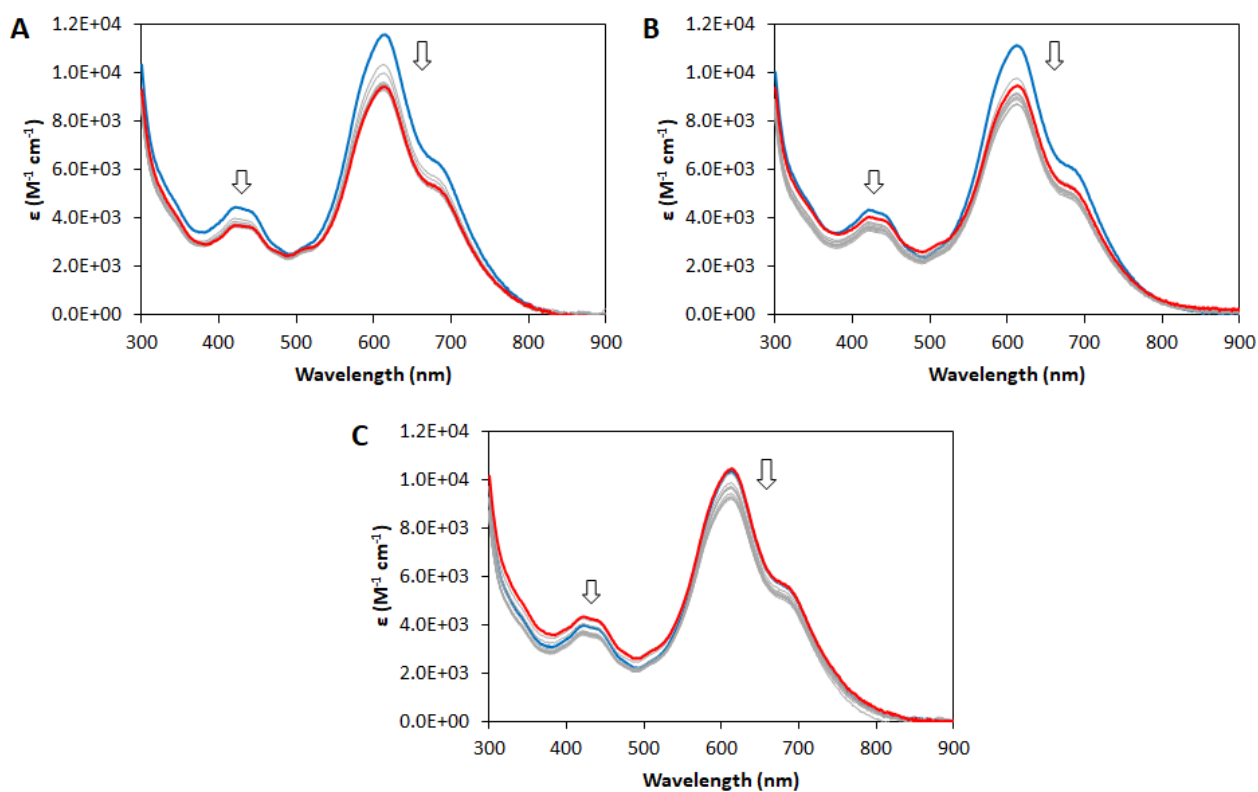

**Figure S9.** Absorption spectra of  $1 \times 10^{-5}$  M solutions of  $C_{6x}$ -NDI **2** in water (pH 7.2,  $1 \times 10^{-2}$  M TRIS-HCl buffer) with 0- $2 \times 10^{-1}$  M A) KCl, B) NaCl, C) LiCl. Blue: no salt; Red:  $2 \times 10^{-1}$  M salt.

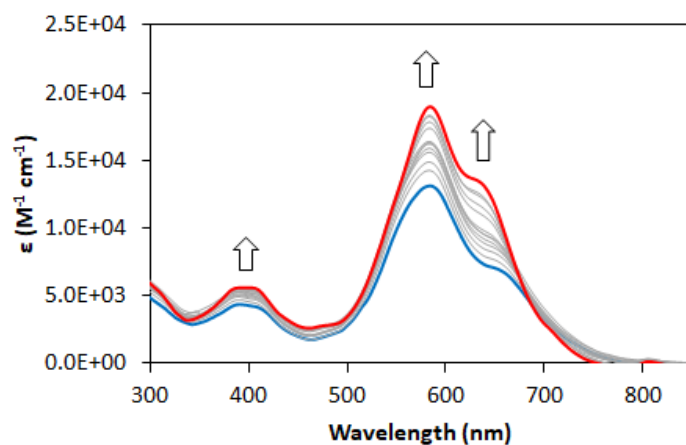

**Figure S10.** Absorption spectra of a  $2 \times 10^{-5}$  M solution of compound **2** in water (pH 7.2,  $1 \times 10^{-2}$  M lithium cacodylate buffer,  $1 \times 10^{-1}$  M KCl) at increasing temperature (25-95°C). Blue = 25°C, Red = 95°C.

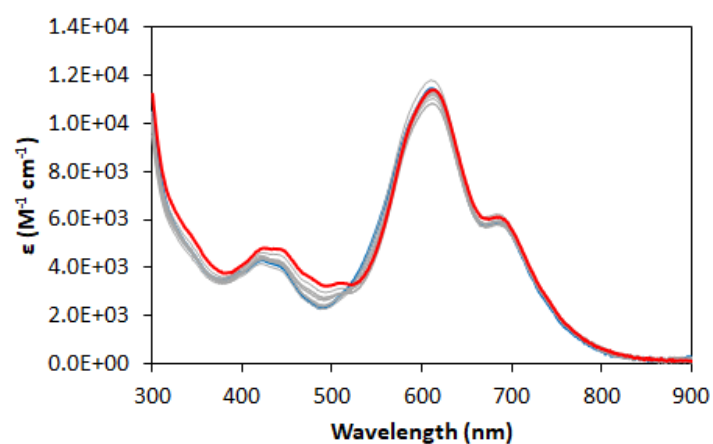

**Figure S11.** Absorption spectra of  $1 \times 10^{-5}$  M solutions of  $c_{ex}$ -NDI **2** in water ( $1 \times 10^{-2}$  M buffer, either phosphoric acid-sodium dihydrogenphosphate, or sodium dihydrogenphosphate-sodium monohydrogenphosphate, or sodium monohydrogenphosphate-sodium phosphate) at increasing pH (from 2 to 12). Blue = pH 2; Red = pH 12.



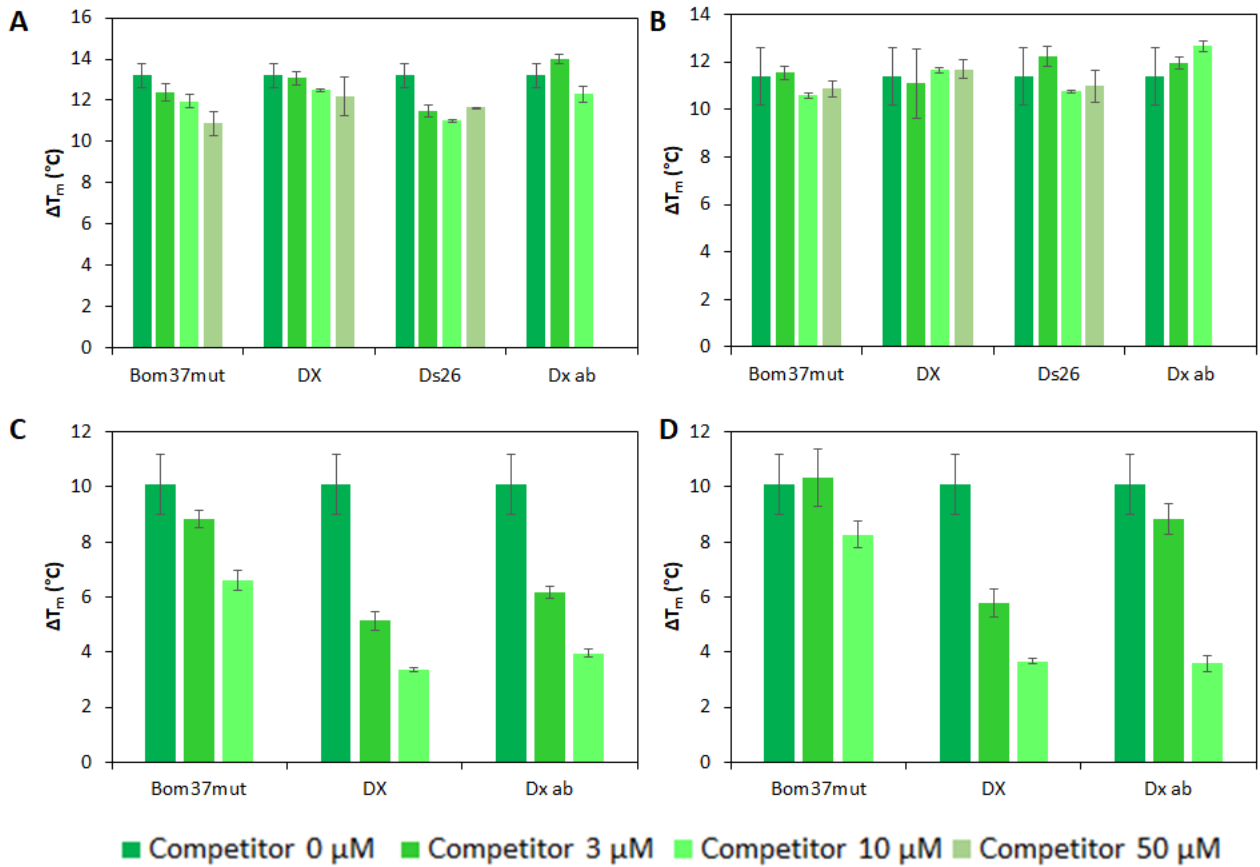

**Figure S12.** Results of FRET melting assays carried out in lithium cacodylate buffer  $1 \times 10^{-2}$  M, pH 7.2, KCl  $1 \times 10^{-3}$  M and LiCl  $9.9 \times 10^{-2}$  M on  $2 \times 10^{-6}$  M nucleic acid with increasing amounts of competitors ( $0$ - $5 \times 10^{-5}$  M). A) 25Ceb with ligand **2** ( $5 \times 10^{-6}$  M); B) c-myc with ligand **2** ( $5 \times 10^{-6}$  M); C) 25Ceb with ligand **1** ( $2.5 \times 10^{-7}$  M); D) c-myc with ligand **1** ( $2.5 \times 10^{-7}$  M). Bom37mut = single strand competitor, DX = hairpin duplex, ds26 = auto-complementary duplex, Dx ab = duplex DNA (Tab. S3).

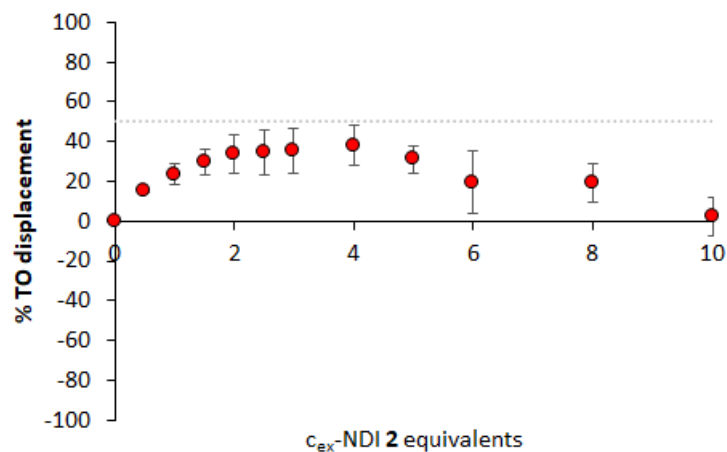

**Figure S13.** FID assay of  $c_{ex}$ -NDI **2** on a Pu24 G4 (pH 7.2,  $1 \times 10^{-2}$  M lithium cacodylate buffer,  $1 \times 10^{-1}$  M KCl,  $T = 25^\circ\text{C}$ ). Dotted lines indicate 50% displacement.

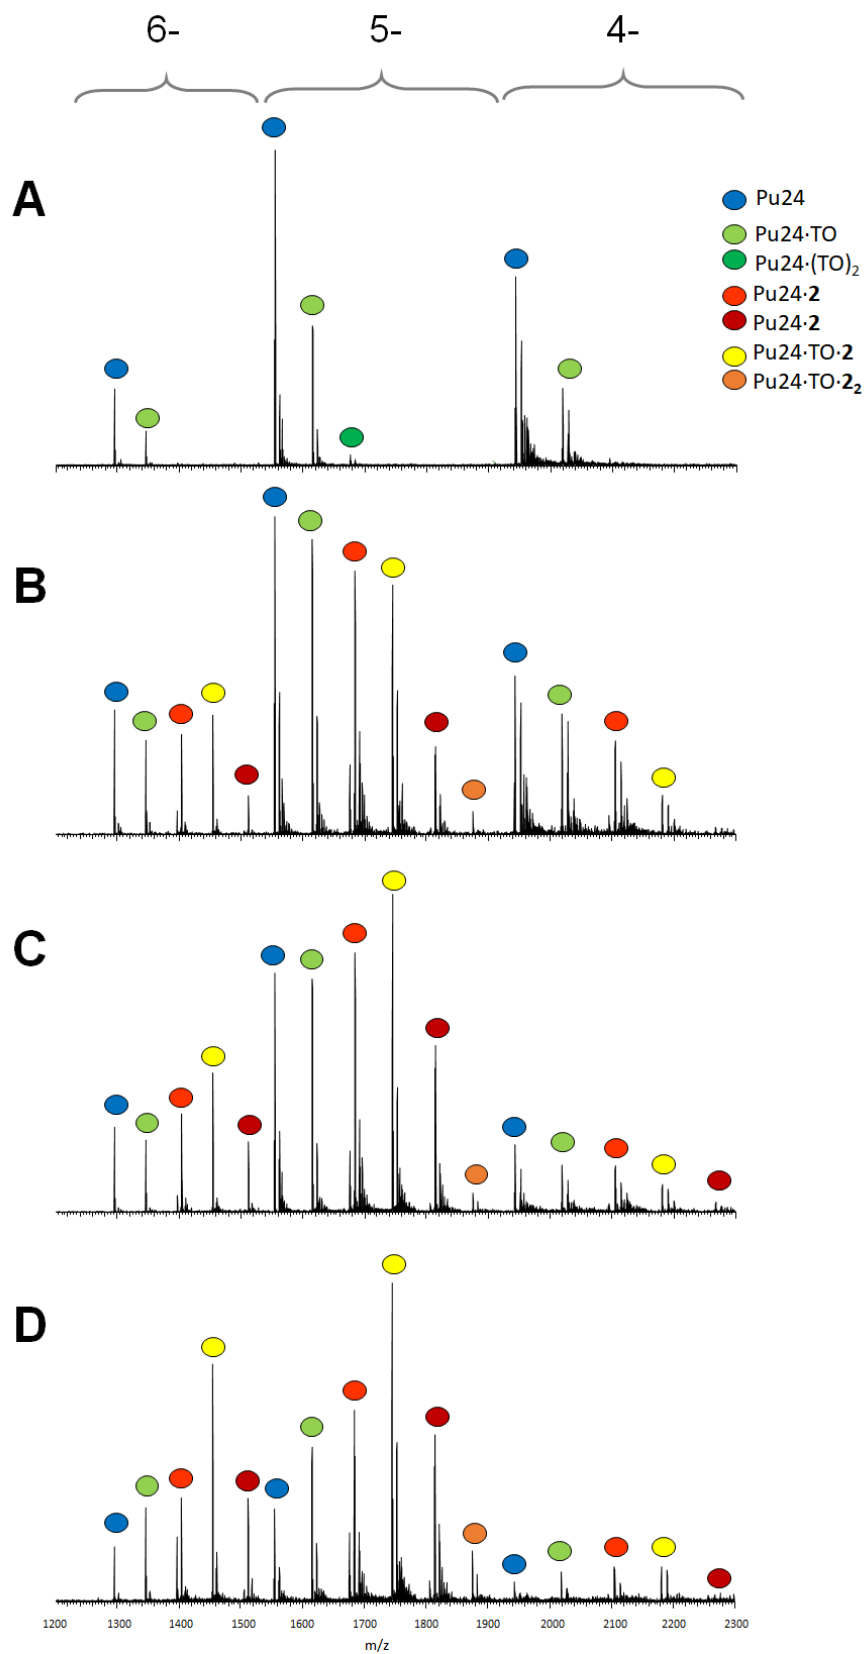

**Figure S14.** MS analysis of a Pu24 ( $5 \times 10^{-6}$  M), TO ( $1 \times 10^{-5}$  M),  $c_{ex}$ -NDI 2 (0, 10, 25,  $50 \times 10^{-6}$  M in A, B, C and D respectively) mixtures (100 mM TMAA, pH 7, 1 mM KCl). All highlighted species contain two  $K^+$  cations in their main peak, in line with the expected 3-quartet G-quadruplex structure.

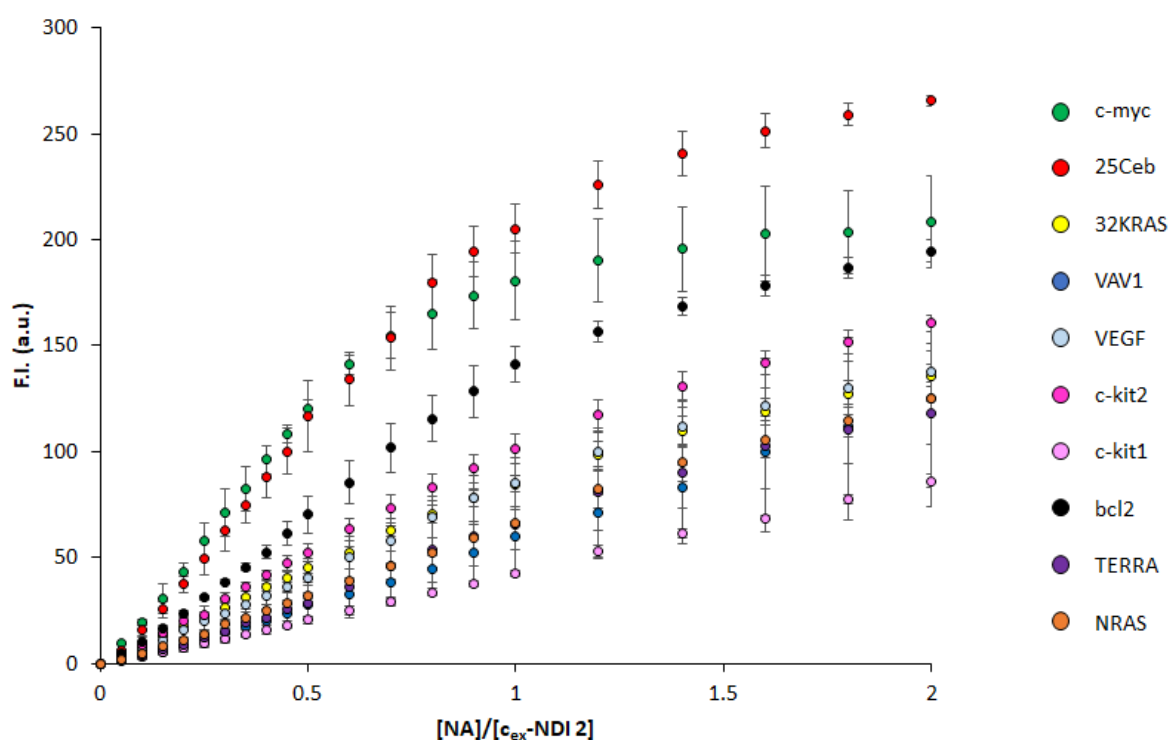

**Figure S15.** Normalized fluorescence in the maximum (685-695 nm), calculated from fluorescence titrations data of  $4 \times 10^{-6}$  M water solutions of  $c_{ex}$ -NDI 2 (pH 7.2,  $1 \times 10^{-2}$  M TRIS-HCl,  $1 \times 10^{-1}$  M KCl,  $T = 25^\circ\text{C}$ ) with an extended panel of parallel G4s,  $c = 0-8 \times 10^{-6}$  M.

**Table S4.** Statistical comparison (T test, equality of variances was verified by F test with  $p < 0.001$ ) of fluorescence enhancement factors of  $c_{ex}$ -NDIs 1 and 2 in the presence of two equivalents of NA. NAs are grouped and compared as parallel G4s against non-parallel G4s or against non-parallel G4s and controls. a) data correspond to the comparison with the parallel G4s group.

|                 |                          | Parallel G4s | Non parallel G4s   | Non-parallel G4s + controls |
|-----------------|--------------------------|--------------|--------------------|-----------------------------|
| $c_{ex}$ -NDI 2 | Average $F/F_{0-1}$      | 155.6        | 56.9               | 42.7                        |
|                 | Standard deviation       | 52.9         | 30.2               | 26.1                        |
|                 | Variance                 | 2803.4       | 683.6              | 914.9                       |
|                 | T                        | -            | 13.4 <sup>a</sup>  | 9.8 <sup>a</sup>            |
|                 | Degrees of freedom       | -            | 12 <sup>a</sup>    | 14 <sup>a</sup>             |
|                 | t critical ( $p=0.001$ ) | -            | 4.32 <sup>a</sup>  | 4.14 <sup>a</sup>           |
| $c_{ex}$ -NDI 1 | Average $F/F_{0-1}$      | 10.6         | 10.9               | 10.9                        |
|                 | Standard deviation       | 1.4          | 2.7                | 2.1                         |
|                 | Variance                 | 2.0          | 7.4                | 4.5                         |
|                 | T                        | -            | 0.32 <sup>a</sup>  | 0.39 <sup>a</sup>           |
|                 | Degrees of freedom       | -            | 5 <sup>a</sup>     | 7 <sup>a</sup>              |
|                 | t critical ( $p=0.001$ ) | -            | 1.476 <sup>a</sup> | 1.415 <sup>a</sup>          |

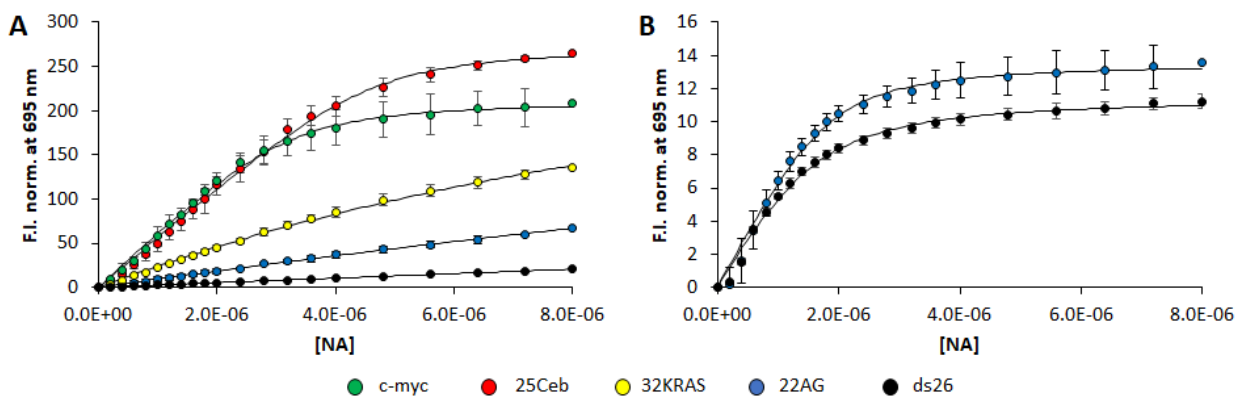

**Figure S16.** Fitting of titrations of A)  $c_{ex}$ -NDI 2 and B)  $c_{ex}$ -NDI 1 presented in fig. 5 for selected NAs.

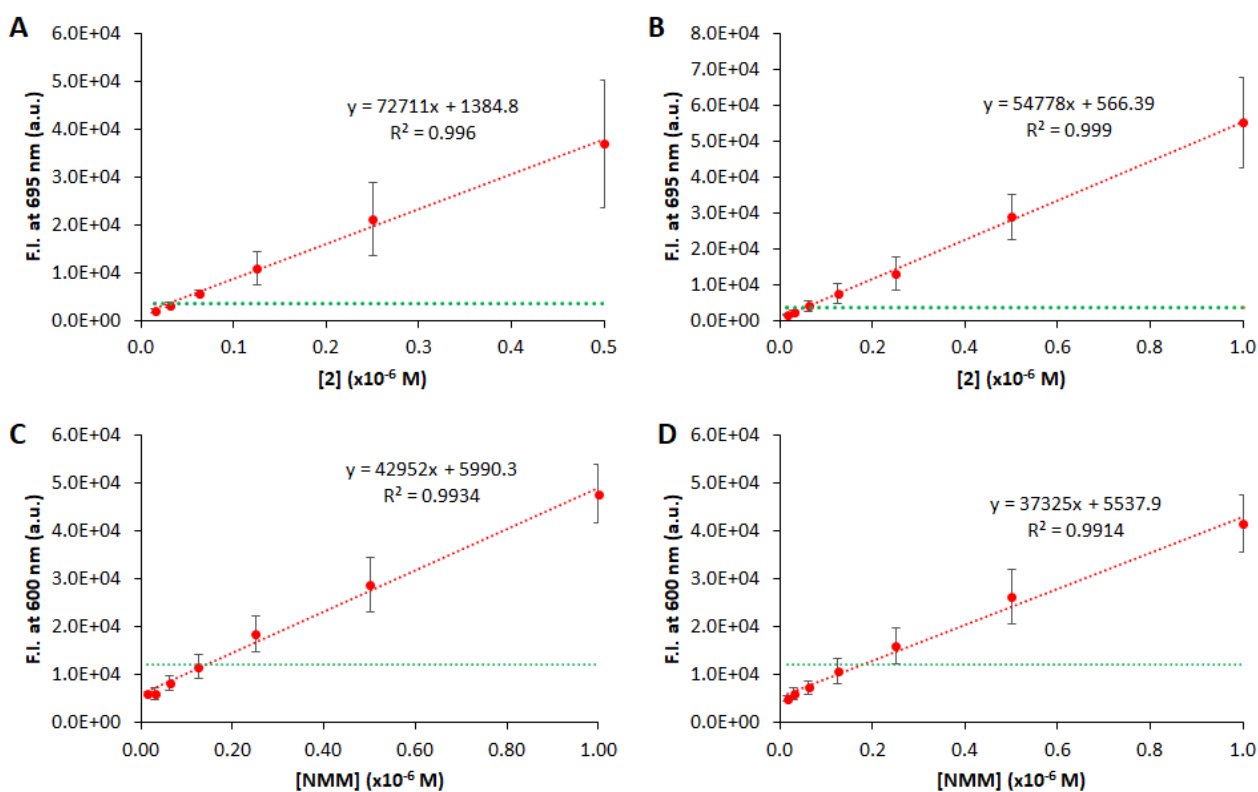

**Figure S17.** Analysis of the sensitivities of  $c_{ex}$ -NDI 2 and NMM in staining the parallel G4s c-myc and 25Ceb. A) sensing of c-myc by 2; B) sensing of 25Ceb by 2, C) sensing of c-myc by NMM; D) sensing of 25Ceb by NMM.  $\lambda_{exc}$  (2) = 650 nm,  $\lambda_{exc}$  (NMM) = 400 nm,  $\lambda_{em}$  (2) = 695 nm,  $\lambda_{em}$  (NMM) = 600 nm. Data are the average of three replicates, each conducted in duplicate conditions. The G4 and compound concentrations varied between 0.1 and  $1 \times 10^{-6}$  M. 20 measurements were performed on the compounds alone, in order to obtain a reasonable  $S_b$  value to use in the LOD calculation.

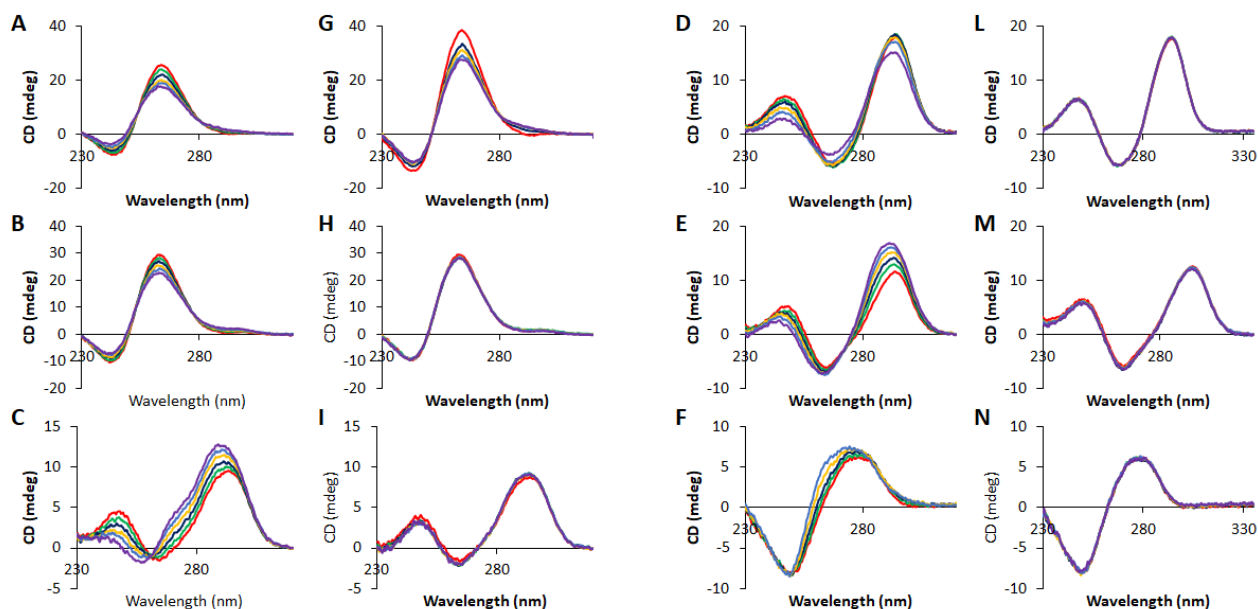

**Figure S18.** Circular dichroism spectra of  $3 \times 10^{-6}$  M solutions (pH 7.2,  $1 \times 10^{-2}$  M lithium cacodylate buffer,  $1 \times 10^{-1}$  M KCl,  $T = 25^\circ\text{C}$ ) of A,G) 25Ceb; B,H) 32KRAS; C,I) 21CTA; D,L) TBA; E,M) Bom17; F,N) ds26 in the presence of  $0-9 \times 10^{-6}$  M  $C_{\text{ex-NDI 1}}$  (A-F) or  $C_{\text{ex-NDI 2}}$  (G-N), corresponding to 0-3 molar equivalents. Red: 0 eqv; green: 0.5 eqv; blue: 1 eqv; yellow: 1.5 eqv; light blue: 2 eqv; purple: 3 eqv.

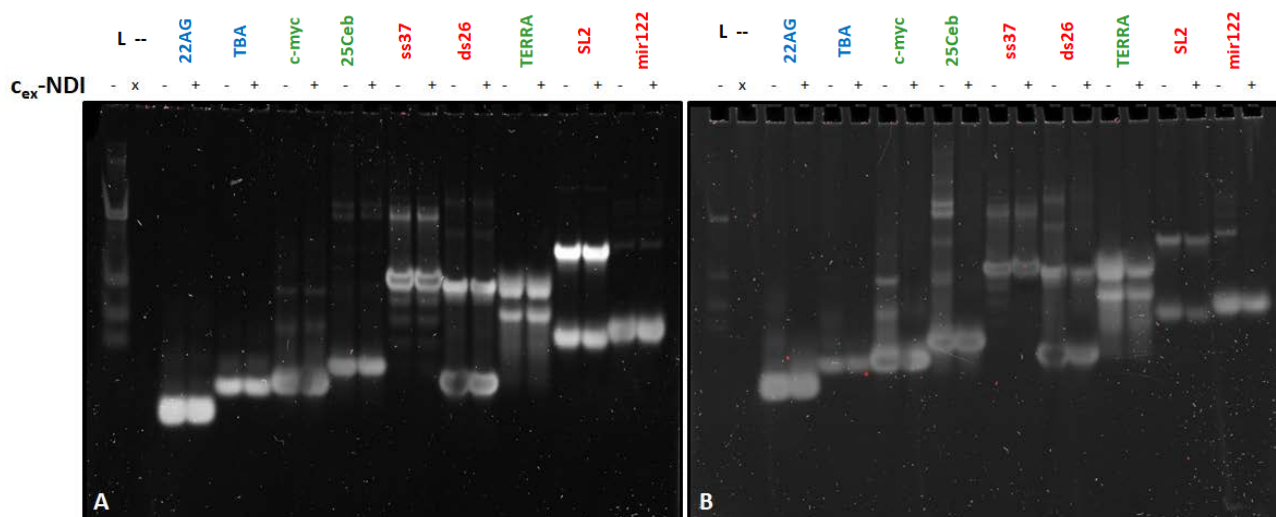

**Figure S19.** Native gel electrophoretic analysis of solutions containing either the NA alone or the NA with 1 equivalent of  $C_{\text{ex-NDI 2}}$  (A) or 1 (B) (NA: 30 pmol, compound: 0-30 pmol, 12% polyacrylamide,  $18^\circ\text{C}$ , 2h, 150 V), stained with SYBR Gold. Green: parallel G4s, blue: non-parallel G4s, orange: controls. L = ladder and fluorescent markers.

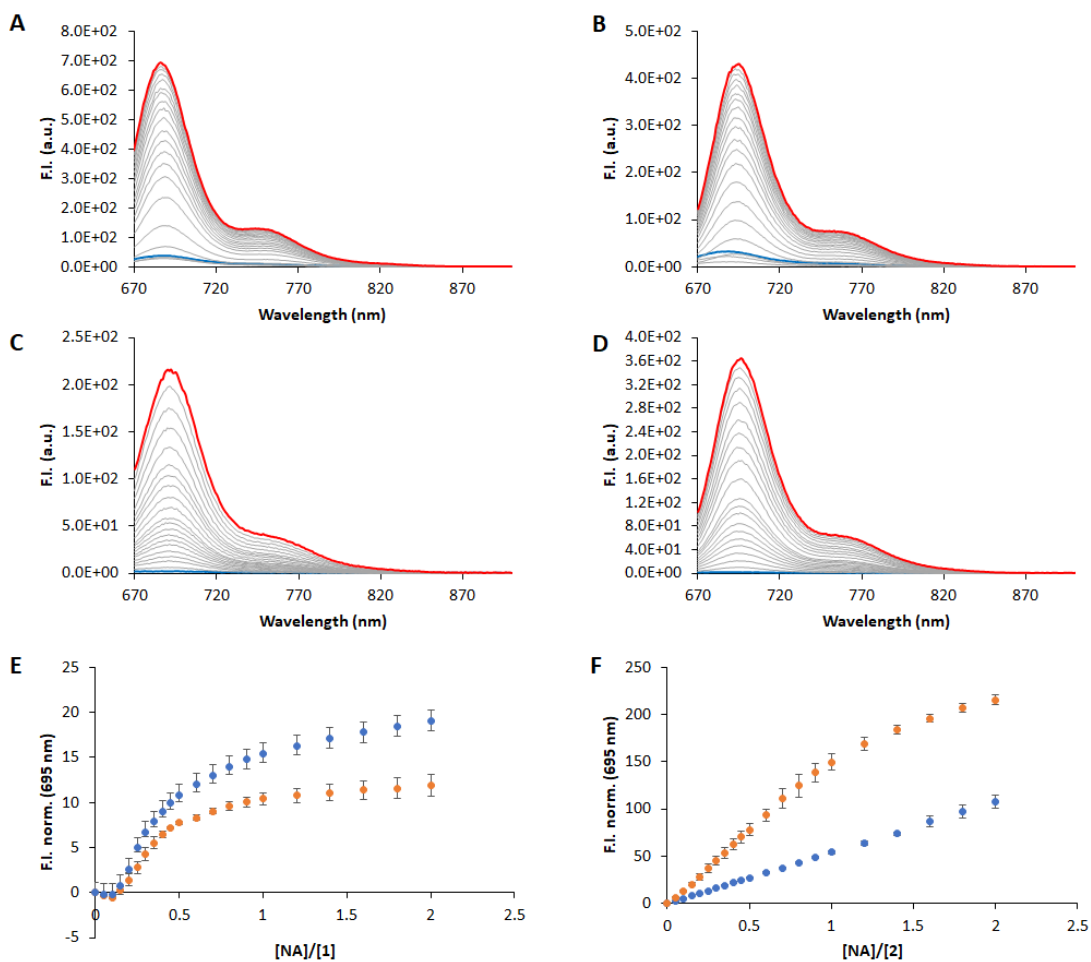

**Figure S20.** Fluorescence titrations of 26TTA (A and C) and Pu24 (B and D) with **1** (A and B) and **2** (C and D) and associated fluorescence enhancement factors (E: compound **1**, F: compound **2**) ( $1 \times 10^{-1}$  M KCl,  $1 \times 10^{-2}$  M TRIS-HCl buffer, pH 7.2,  $4 \times 10^{-6}$  M  $c_{ex}$ -NDI,  $0-8 \times 10^{-6}$  M G4,  $\lambda_{exc} = 650$  nm).

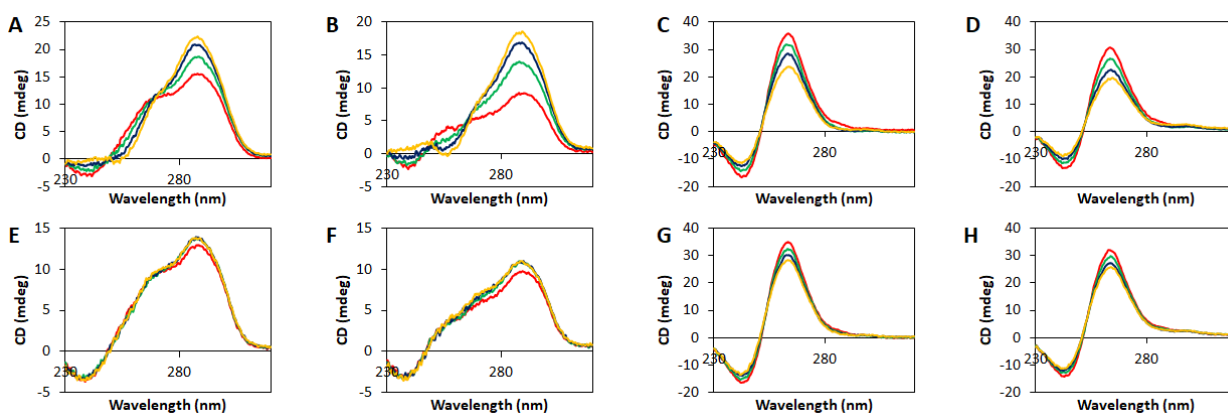

**Figure S21.** Circular dichroism spectra of  $3 \times 10^{-6}$  M solutions (pH 7.2,  $1 \times 10^{-2}$  M lithium cacodylate buffer,  $1 \times 10^{-1}$  M KCl,  $T = 25^\circ\text{C}$ ) of A,B,E,F) 26TTA; C,D,G,H) Pu24 in the presence of  $0-9 \times 10^{-6}$  M  $c_{ex}$ -NDI **1** (A-D) or  $c_{ex}$ -NDI **2** (E-H), corresponding to 0-3 molar equivalents. Spectra in graphs A, C, E and G were recorded in  $1 \times 10^{-2}$  M lithium cacodylate buffer (pH 7.2) in the presence of  $1 \times 10^{-1}$  M KCl, whereas spectra in graphs B, D, F and H were recorded in  $1 \times 10^{-1}$  M TMAA buffer (pH 7) in the presence of  $1 \times 10^{-3}$  M KCl. Red: 0 eqv; green: 1 eqv; blue: 2 eqv; yellow: 3 eqv.

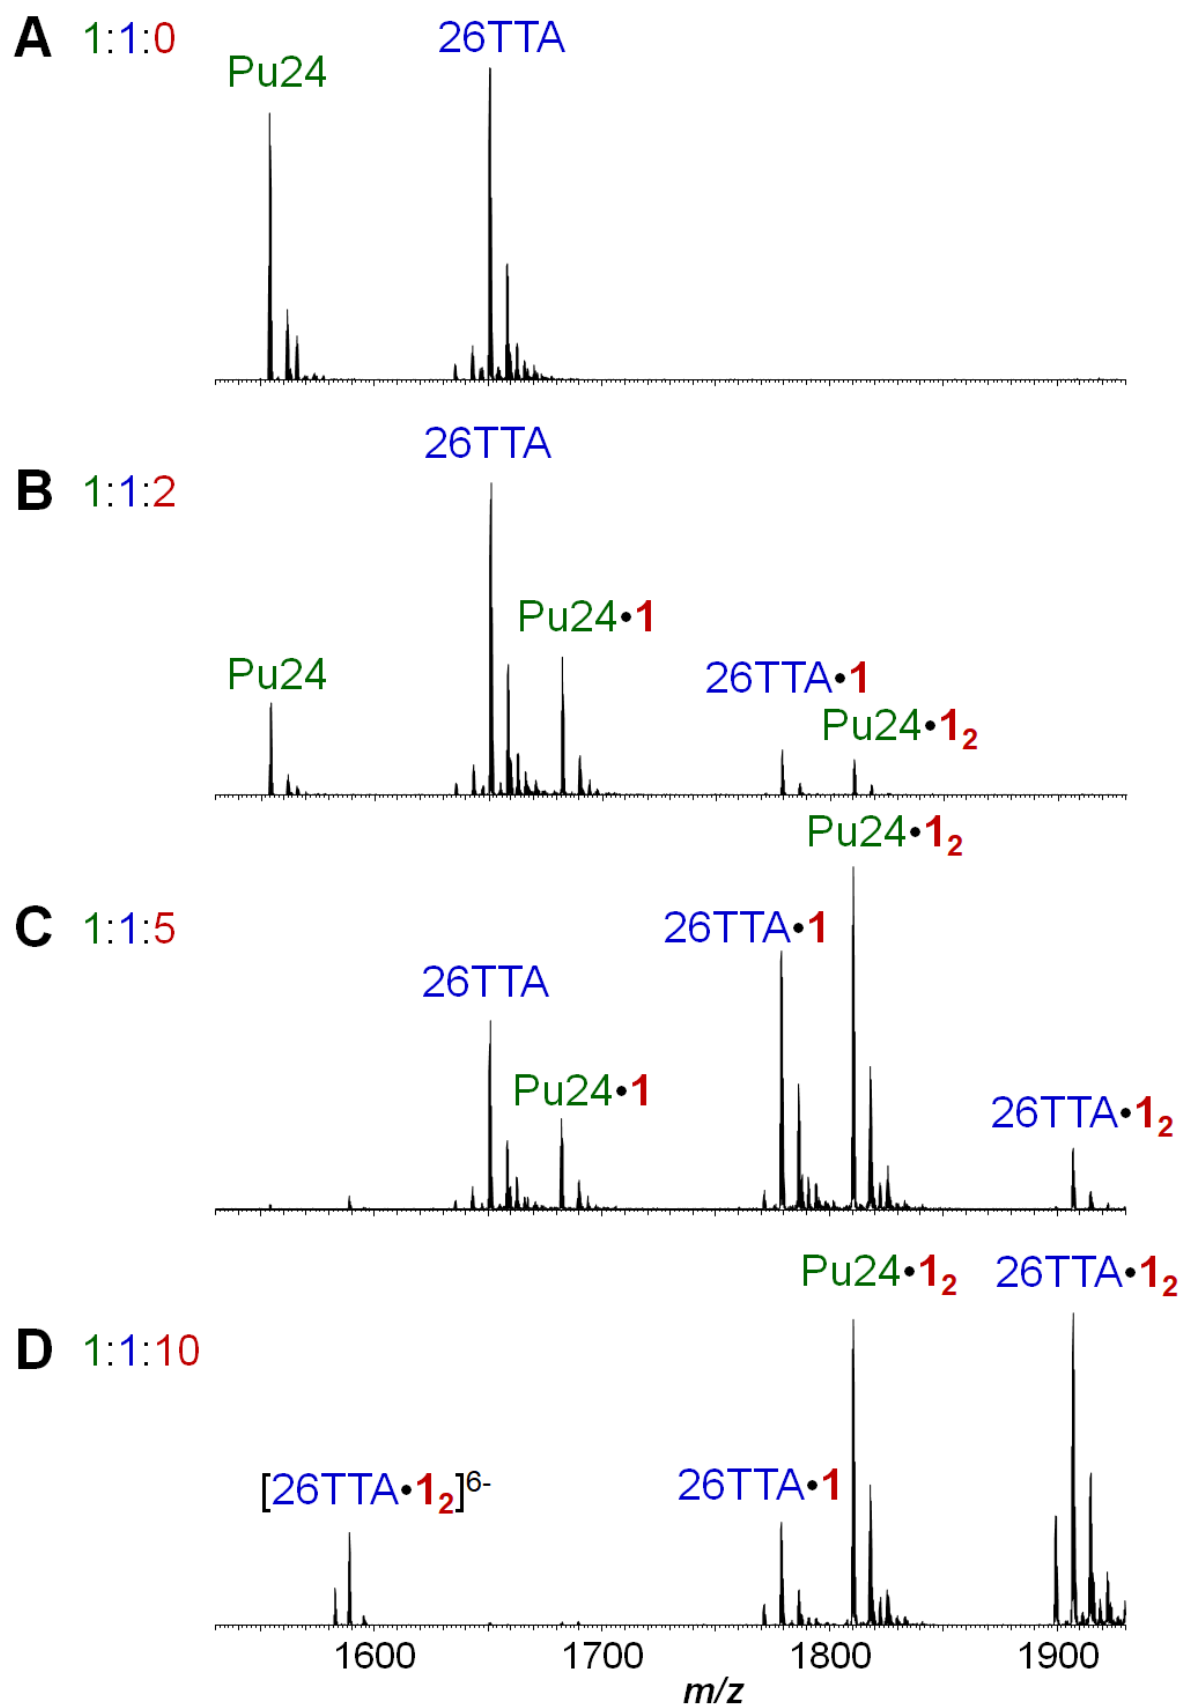

**Figure S22.** Mass spectra of a 1:1 mixture of Pu24 and 26TTA G4s (5  $\mu$ M each, 0.1 M TMAA, pH 7, 1 mM KCl) in the presence of increasing amounts of *c*<sub>ex</sub>-NDI 1 (0, 2, 5 and 10 molar equivalents).

## HPLC purity data

### Compound 1

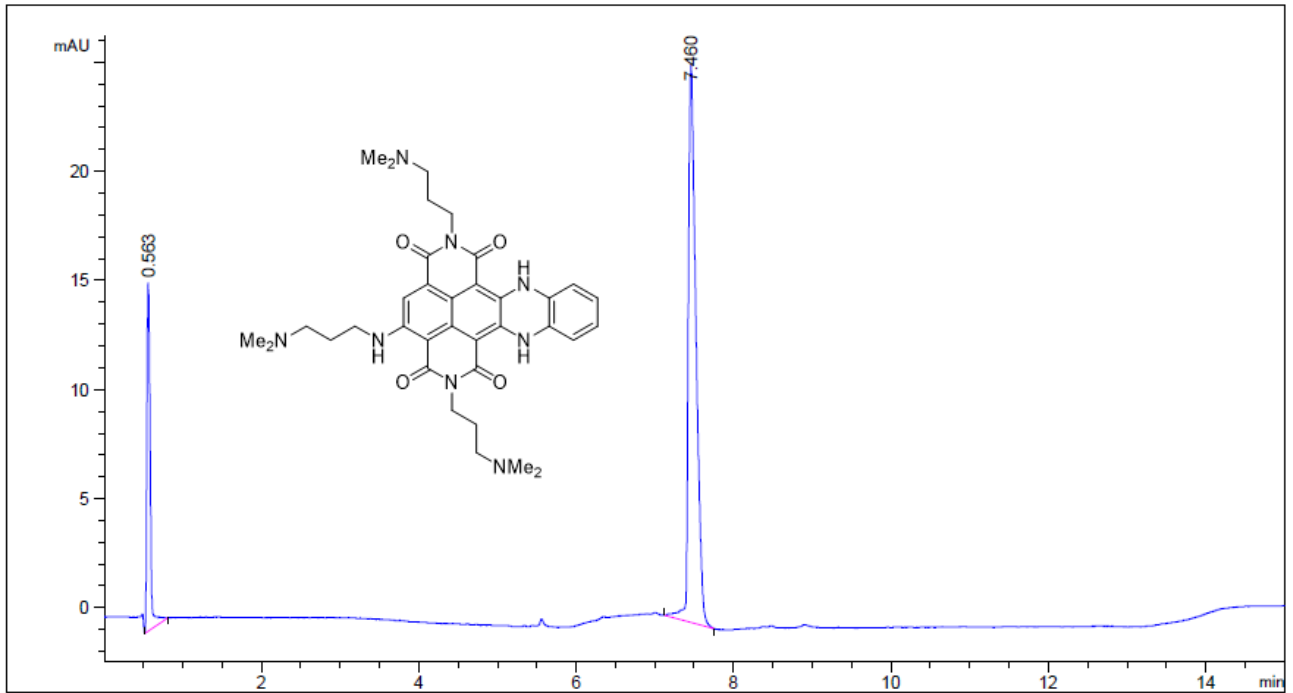

### Compound 2

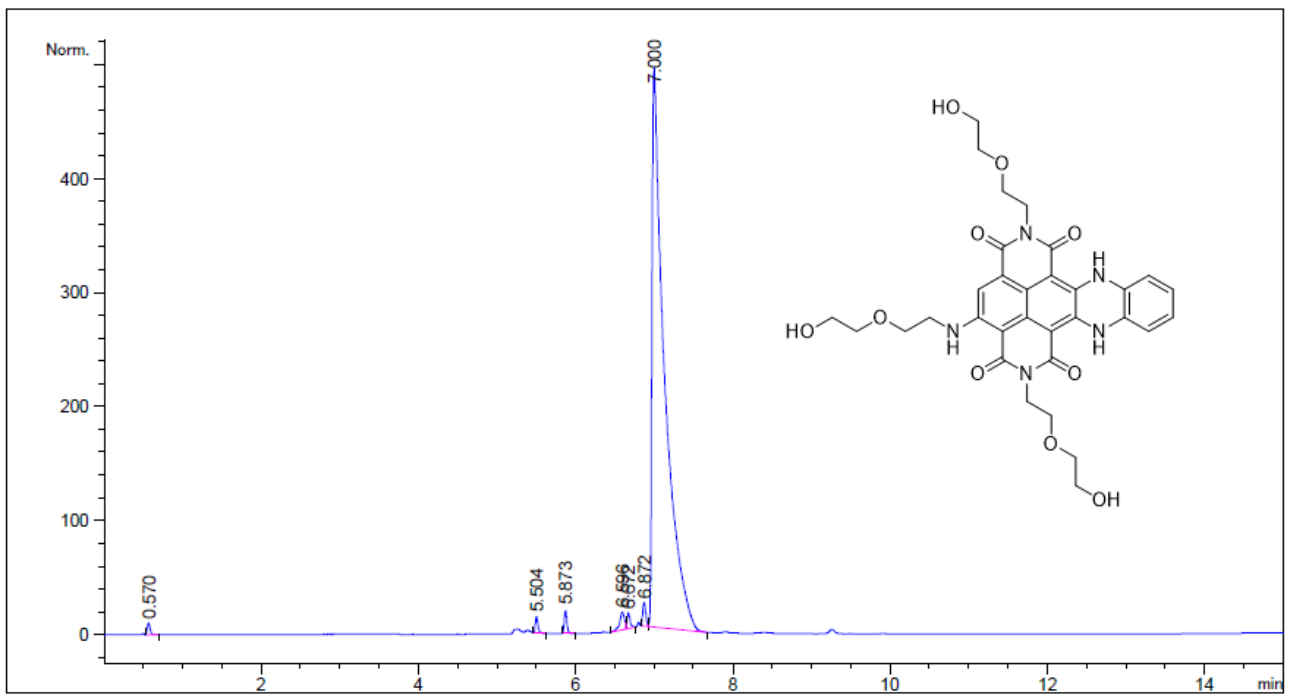



### Compound 8

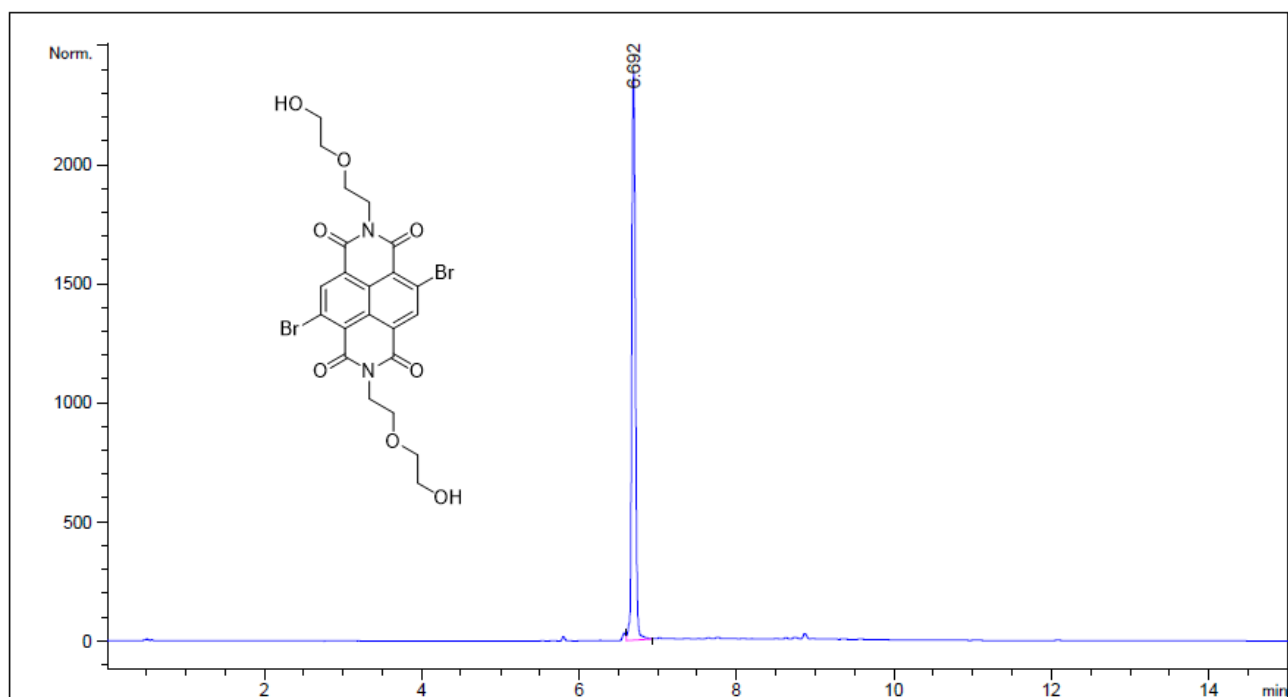

### Compound 9

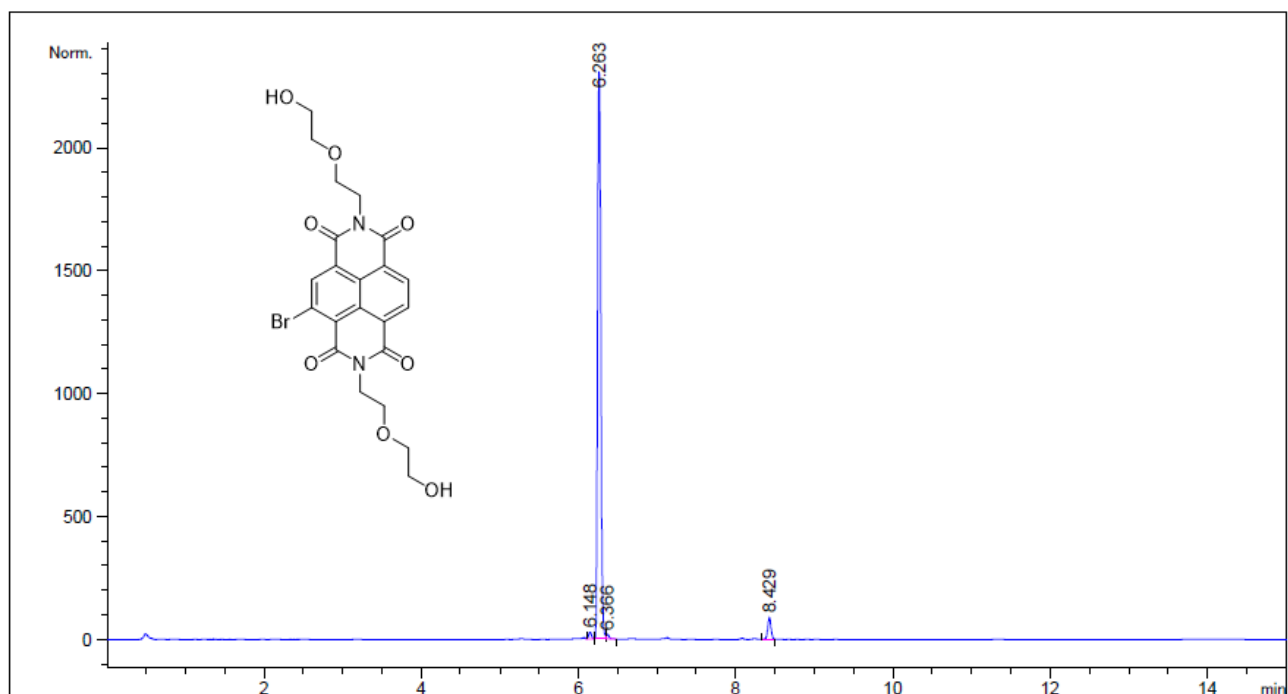

### Compound 12

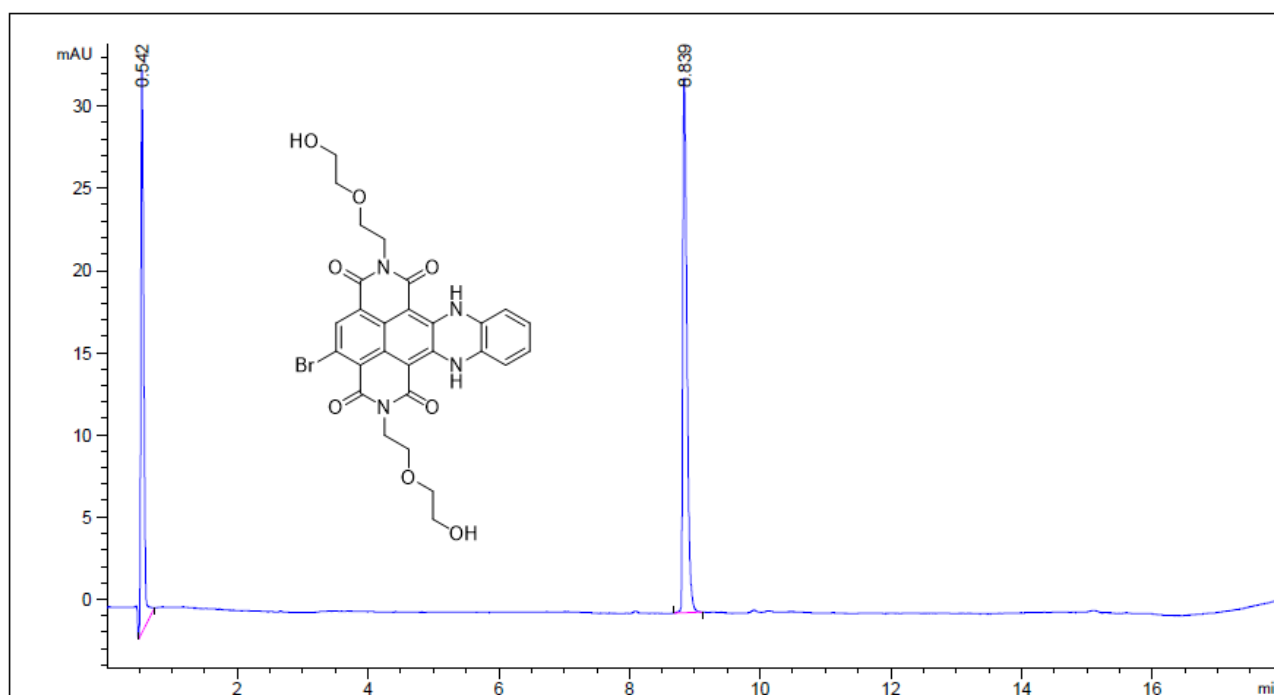

### Compound 13

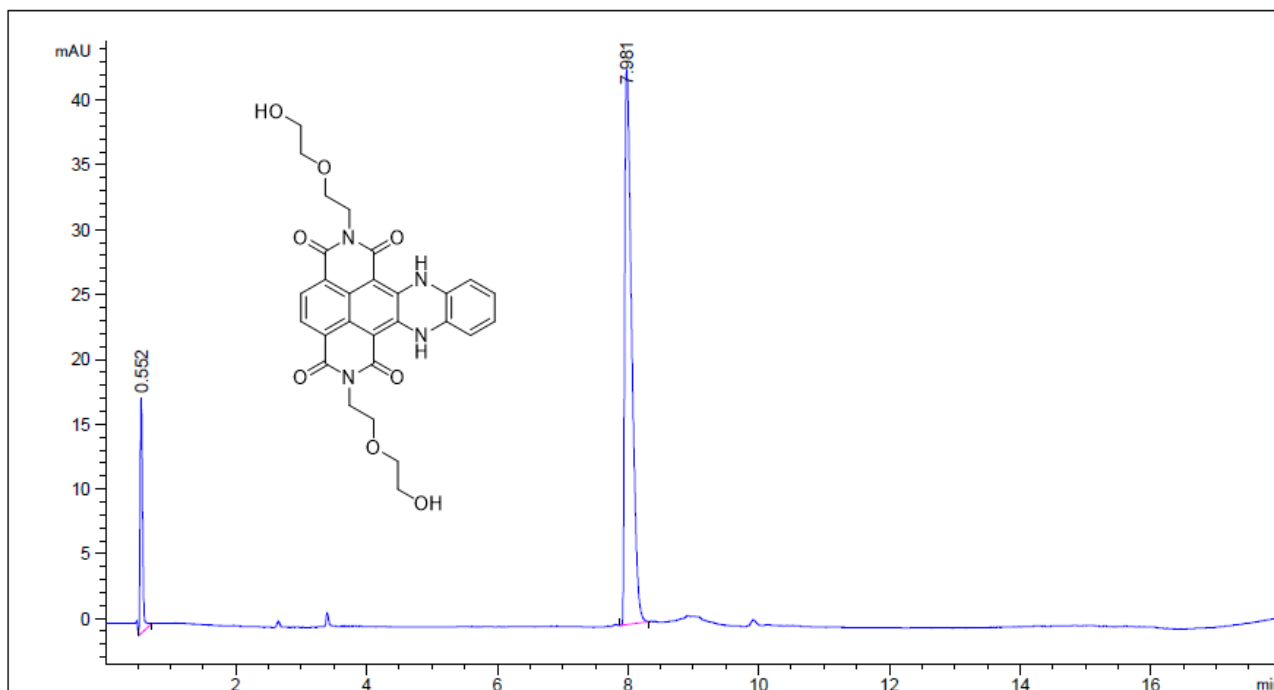

# NMR characterization

## Compound 2 – <sup>1</sup>H NMR

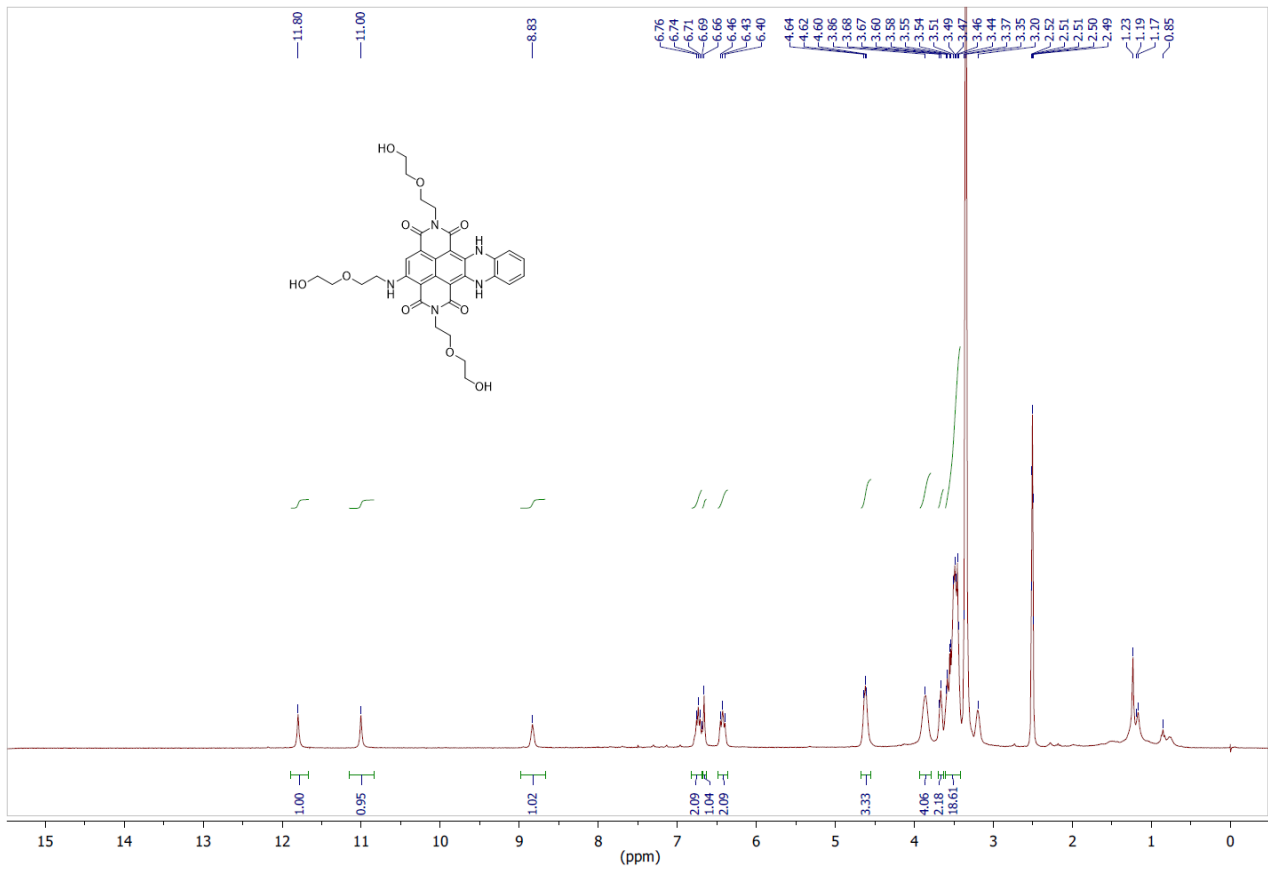

### Compound 8 – <sup>1</sup>H NMR

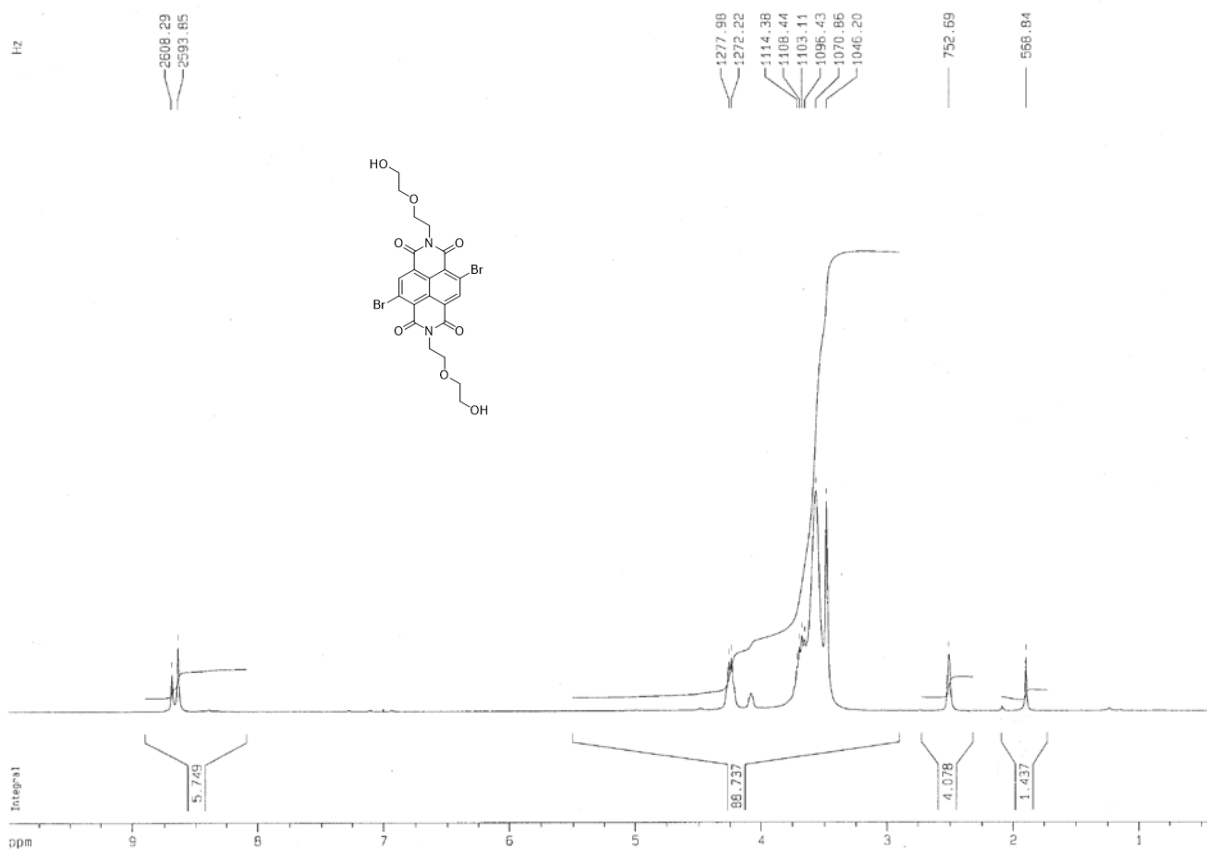

### Compound 8 – <sup>13</sup>C NMR

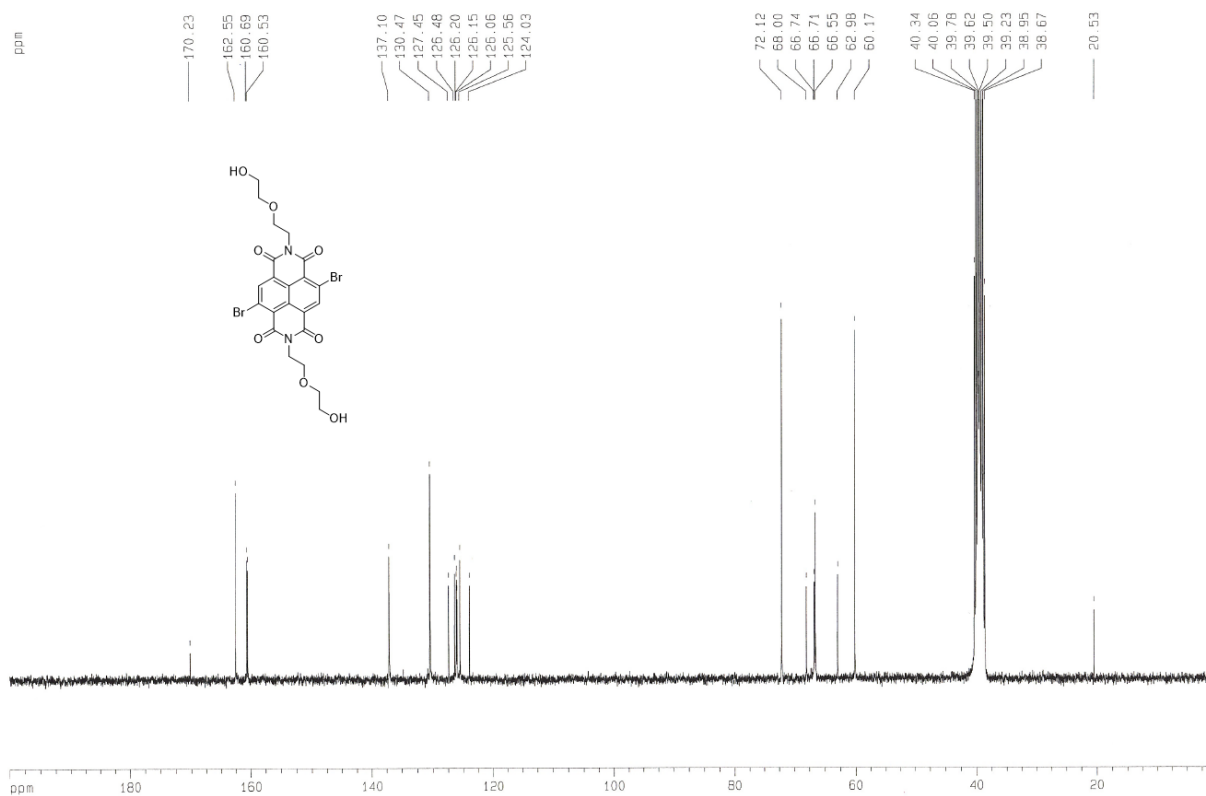

### Compound 9 – <sup>1</sup>H NMR

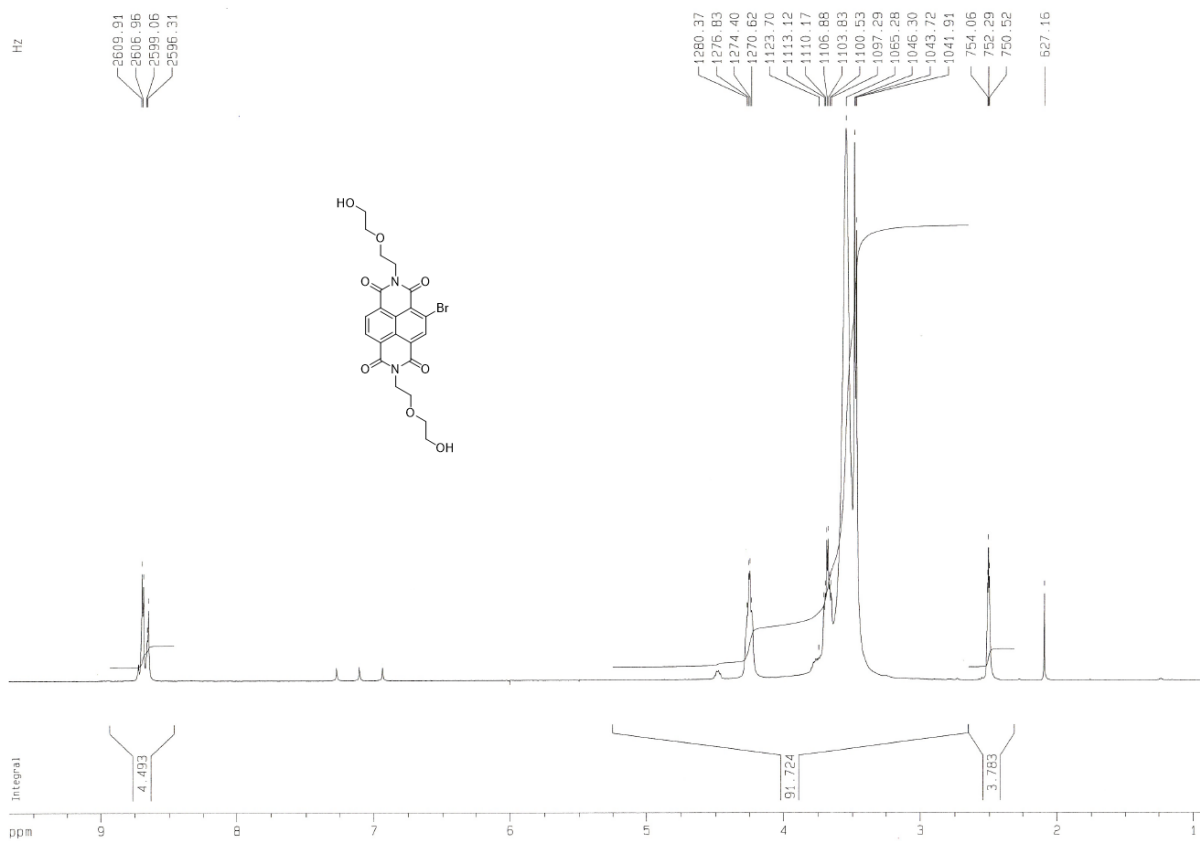

### Compound 9 – <sup>13</sup>C NMR

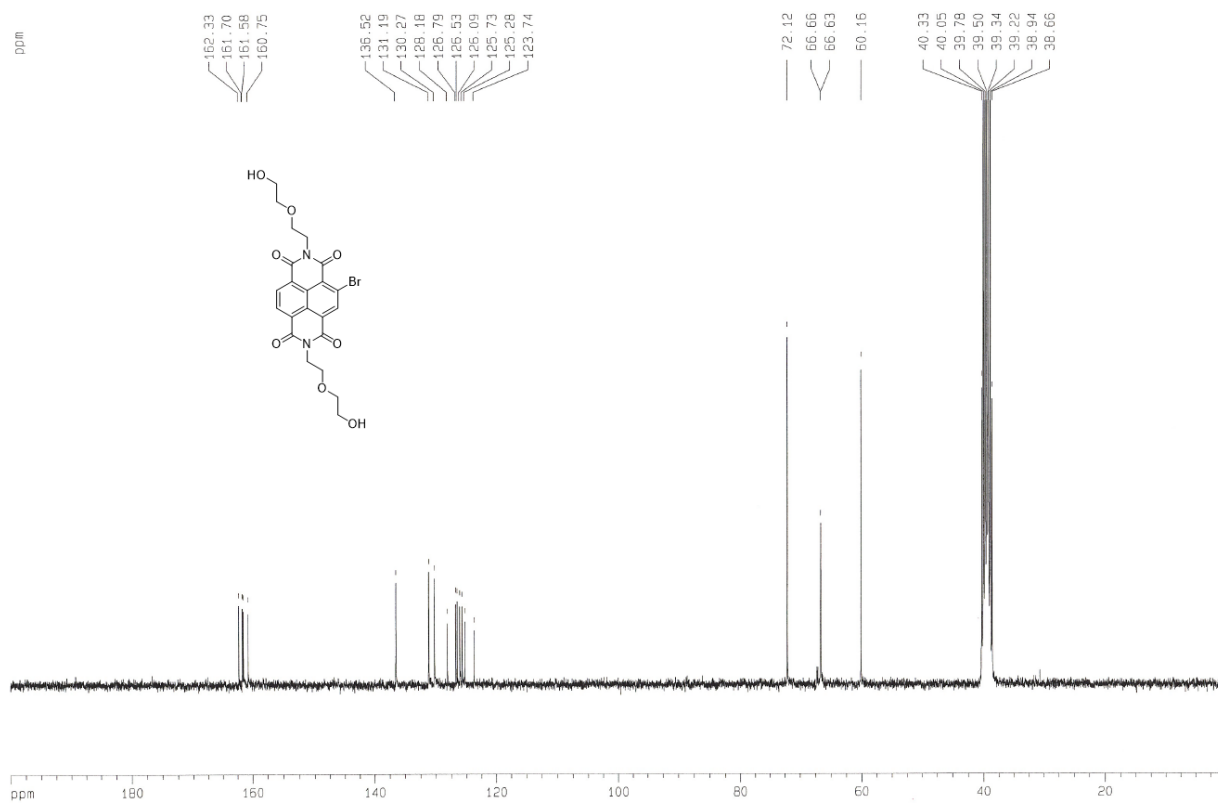

# Compound 12 – <sup>1</sup>H NMR

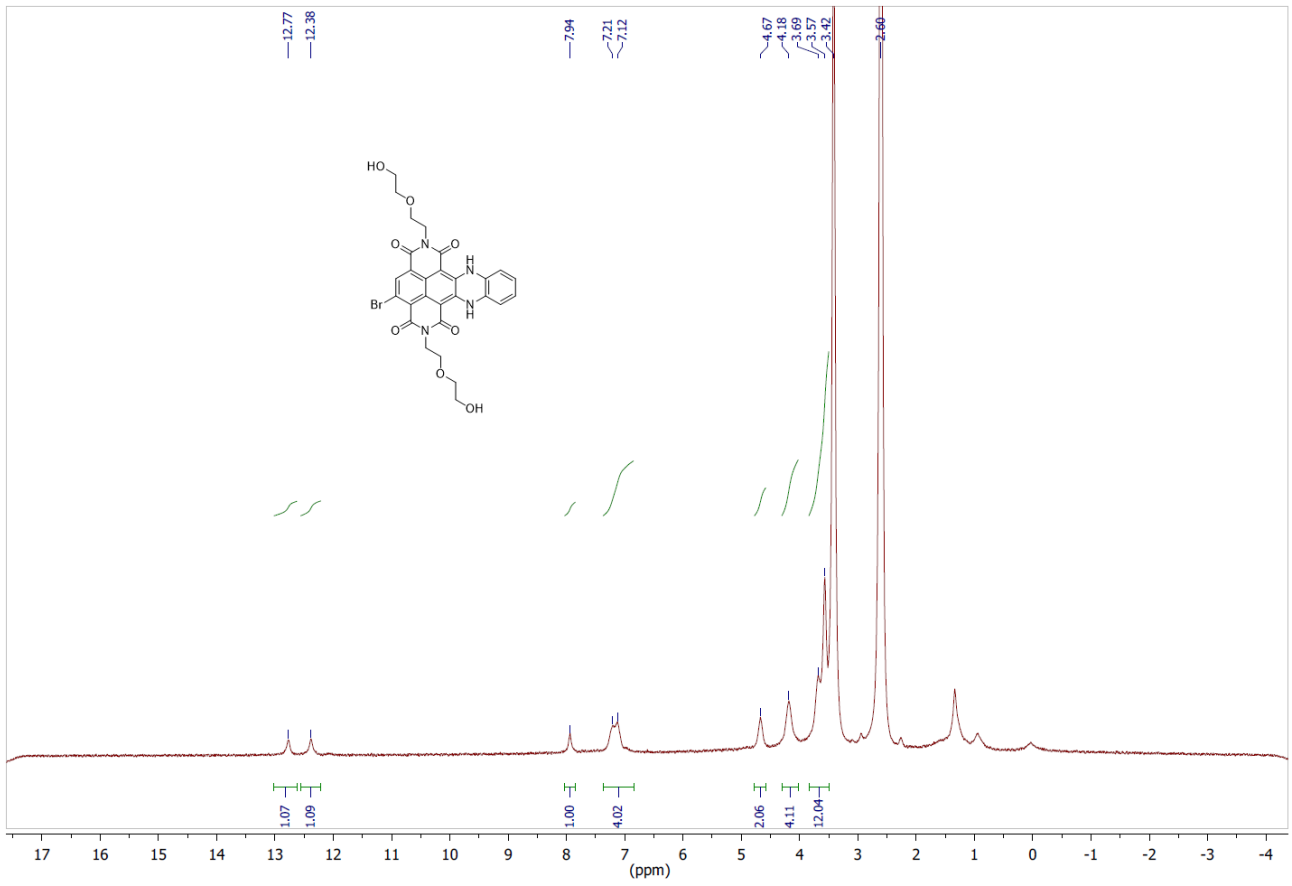

### Compound 13 – <sup>1</sup>H NMR

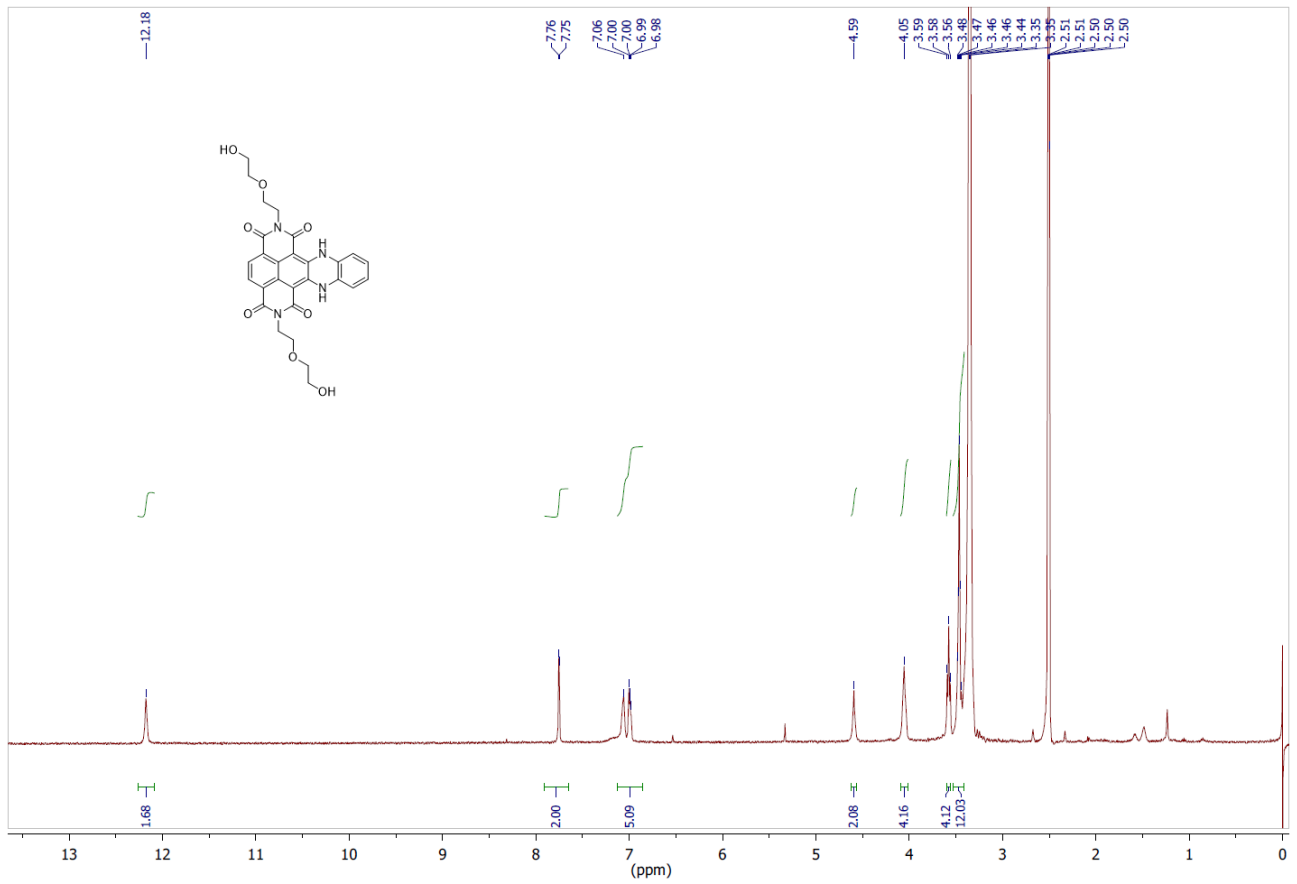

### Compound 13 – <sup>13</sup>C NMR

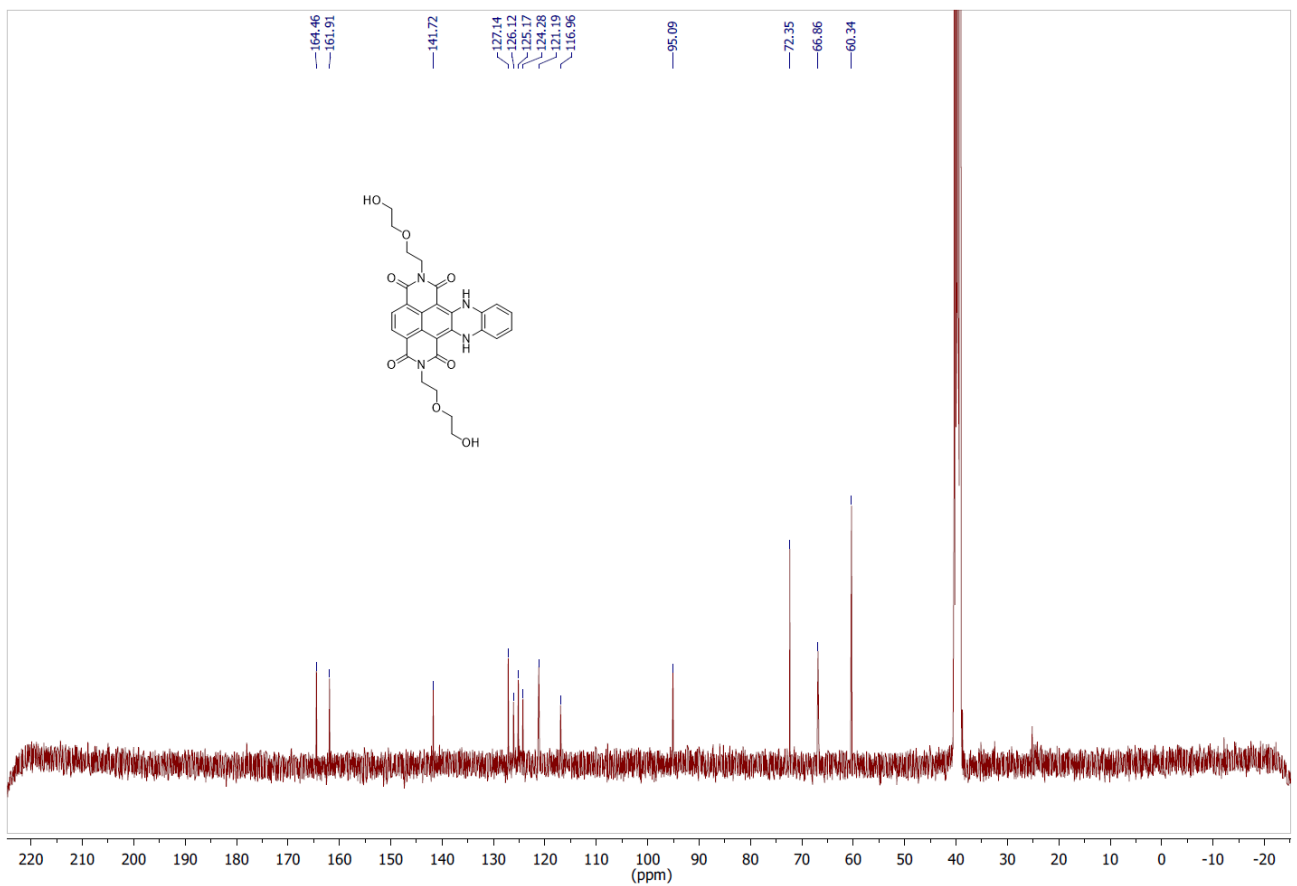

## Supplementary references

1. Amrane, S., Adrian, M., Heddi, B., Serero, A., Nicolas, A., Mergny, J.-L. and Phan, A.T. (2012) Formation of Pearl-Necklace Monomeric G-Quadruplexes in the Human CEB25 Minisatellite. *Journal of the American Chemical Society*, **134**, 5807-5816.
2. Largy, E. and Mergny, J.-L. (2014) Shape matters: size-exclusion HPLC for the study of nucleic acid structural polymorphism. *Nucleic Acids Research*, **42**, e149-e149.
3. Phan, A.T. (2010) Human telomeric G-quadruplex: structures of DNA and RNA sequences. *FEBS Journal*, **277**, 1107-1117.
4. De Rache, A. and Mergny, J.-L. (2015) Assessment of selectivity of G-quadruplex ligands via an optimised FRET melting assay. *Biochimie*, **115**, 194-202.
5. Nicoludis, J.M., Barrett, S.P., Mergny, J.-L. and Yatsunyk, L.A. (2012) Interaction of human telomeric DNA with N-methyl mesoporphyrin IX. *Nucleic Acids Research*, **40**, 5432-5447.
6. Phan, A.T., Kuryavyi, V., Gaw, H.Y. and Patel, D.J. (2005) Small-molecule interaction with a five-guanine-tract G-quadruplex structure from the human MYC promoter. *Nature chemical biology*, **1**, 167-173.
7. Kumar, N. and Maiti, S. (2008) A thermodynamic overview of naturally occurring intramolecular DNA quadruplexes. *Nucleic Acids Research*, **36**, 5610-5622.
8. Zhang, A.Y.Q., Bugaut, A. and Balasubramanian, S. (2011) A Sequence-Independent Analysis of the Loop Length Dependence of Intramolecular RNA G-Quadruplex Stability and Topology. *Biochemistry*, **50**, 7251-7258.
9. Dai, J., Carver, M., Punchihewa, C., Jones, R.A. and Yang, D. (2007) Structure of the Hybrid-2 type intramolecular human telomeric G-quadruplex in K(+) solution: insights into structure polymorphism of the human telomeric sequence. *Nucleic Acids Research*, **35**, 4927-4940.
